# Supplementary material
Source: publisher figshare collection journal article supplement (https://asha.figshare.com/articles/dataset/_/8038889)
Supplement: Supplementary file 2 [file 1]

**Supplemental Material S4.** Results of linear mixed-effects model on pitch shape (slope and curvature) in children’s lexical tone productions, with two fixed factors “Group” (NH = 3, CI\_Imp 1-2, CI\_Imp 2-3, CI\_Imp 3-4, and CI\_Imp 4-5) and “Tones” (T1, T2, T3 and T4) and a covariate “Chronological Age.”

| Parameter       | Factors                          | df 1      | df 2        | <i>F</i>    | <i>p</i>            |
|-----------------|----------------------------------|-----------|-------------|-------------|---------------------|
| Pitch slope     | Group                            | 4         | 145         | 0.83        | .508                |
|                 | <b>Tone</b>                      | <b>3</b>  | <b>5882</b> | <b>4.47</b> | <b>&lt; .01**</b>   |
|                 | Chronological age                | 1         | 145         | 3.05        | .083                |
|                 | <b>Group × Tone</b>              | <b>12</b> | <b>5890</b> | <b>3.64</b> | <b>&lt; .001***</b> |
|                 | Group × Chronological Age        | 4         | 145         | 0.65        | .628                |
|                 | Tone × Chronological Age         | 3         | 5882        | 0.82        | .480                |
|                 | Group × Tone × Chronological Age | 12        | 5889        | 1.19        | .282                |
| Pitch curvature | <b>Group</b>                     | <b>4</b>  | <b>151</b>  | <b>3.10</b> | <b>&lt; .05*</b>    |
|                 | <b>Tone</b>                      | <b>3</b>  | <b>5882</b> | <b>3.73</b> | <b>&lt; .05*</b>    |
|                 | Chronological Age                | 1         | 152         | 2.35        | .127                |
|                 | <b>Group × Tone</b>              | <b>12</b> | <b>5893</b> | <b>3.91</b> | <b>&lt; .001***</b> |
|                 | Group × Chronological Age        | 4         | 151         | 2.21        | .071                |
|                 | Tone × Chronological Age         | 3         | 5882        | 1.50        | .214                |
|                 | Group × Tone × Chronological Age | 12        | 5891        | 1.23        | .256                |

*Note.* NH = normal hearing; CI = cochlear implant.
