# Supplementary material
Source: publisher figshare collection journal article supplement (https://asha.figshare.com/articles/dataset/_/8038889)
Supplement: Supplementary file 3 [file 1]

**Supplemental Material S32.** Results of linear mixed-effects model on pitch shape (slope and curvature) in children’s trisyllabic tone sandhi productions (Syllables 1 and 2), with two fixed factors “Group” (NH = 3, CI\_Imp 1-2, CI\_Imp 2-3, CI\_Imp 3-4, and CI\_Imp 4-5) and “Context” (double-T3 and triple-T3) and a covariate “Chronological Age.”

| Syllable   | Parameter       | Factors                             | df 1     | df 2        | <i>F</i>    | <i>p</i>            |
|------------|-----------------|-------------------------------------|----------|-------------|-------------|---------------------|
| Syllable 1 | Pitch slope     | <b>Group</b>                        | <b>4</b> | <b>174</b>  | <b>6.44</b> | <b>&lt; .001***</b> |
|            |                 | Context                             | 1        | 5722        | 0.33        | .568                |
|            |                 | Chronological Age                   | 1        | 174         | 2.03        | .156                |
|            |                 | <b>Group × Context</b>              | <b>4</b> | <b>5733</b> | <b>5.66</b> | <b>&lt; .001***</b> |
|            |                 | Group × Chronological Age           | 4        | 174         | 1.20        | .312                |
|            |                 | Context × Chronological Age         | 1        | 5733        | 0.33        | .565                |
|            |                 | Group × Context × Chronological Age | 4        | 5733        | 2.15        | .072                |
|            | Pitch curvature | Group                               | 4        | 2145        | 0.77        | .544                |
|            |                 | Context                             | 1        | 5596        | 0.31        | .576                |
|            |                 | Chronological Age                   | 1        | 2146        | 1.17        | .279                |
|            |                 | Group × Context                     | 4        | 5727        | 0.42        | .794                |
|            |                 | Group × Chronological Age           | 4        | 2145        | 1.07        | .370                |
|            |                 | Context × Chronological Age         | 1        | 5727        | 0.24        | .624                |
|            |                 | Group × Context × Chronological Age | 4        | 5727        | 0.41        | .802                |
| Syllable 2 | Pitch slope     | <b>Group</b>                        | <b>4</b> | <b>177</b>  | <b>3.56</b> | <b>&lt; .01**</b>   |
|            |                 | <b>Context</b>                      | <b>1</b> | <b>1405</b> | <b>4.68</b> | <b>&lt; .05*</b>    |
|            |                 | Chronological Age                   | 1        | 177         | 0.23        | .631                |
|            |                 | <b>Group × Context</b>              | <b>4</b> | <b>5734</b> | <b>5.56</b> | <b>&lt; .001***</b> |
|            |                 | Group × Chronological Age           | 4        | 177         | 0.74        | .564                |
|            |                 | Context × Chronological Age         | 1        | 5728        | 0.55        | .457                |
|            |                 | Group × Context × Chronological Age | 4        | 5728        | 0.24        | .919                |
|            | Pitch curvature | Group                               | 4        | 742         | 0.37        | .828                |
|            |                 | Context                             | 1        | 4698        | 0.53        | .467                |
|            |                 | Chronological Age                   | 1        | 743         | 1.61        | .204                |
|            |                 | <b>Group × Context</b>              | <b>4</b> | <b>5722</b> | <b>3.14</b> | <b>&lt; .05*</b>    |
|            |                 | Group × Chronological Age           | 4        | 742         | 0.40        | .806                |
|            |                 | Context × Chronological Age         | 1        | 5721        | 0.31        | .575                |
|            |                 | Group × Context × Chronological Age | 4        | 5721        | 0.44        | .779                |

*Note.* NH = normal hearing; CI = cochlear implant.
