# Supplementary material
Source: publisher figshare collection journal article supplement (https://asha.figshare.com/articles/dataset/_/8038889)
Supplement: Supplementary file 4 [file 1]

**Supplemental Material S25.** Results of linear mixed-effects model on pitch shape (slope and curvature) in children’s disyllabic Context sandhi productions (Syllable 1), with two fixed factors “Group” (NH = 3, CI\_Imp 1-2, CI\_Imp 2-3, CI\_Imp 3-4, and CI\_Imp 4-5) and “Context” (full sandhi vs. half sandhi) and a covariate “Chronological Age.”

| Parameter       | Factors                             | df 1     | df 2         | F            | p                   |
|-----------------|-------------------------------------|----------|--------------|--------------|---------------------|
| Pitch slope     | Group                               | 4        | 102          | 0.55         | .700                |
|                 | <b>Context</b>                      | <b>1</b> | <b>3756</b>  | <b>22.10</b> | <b>&lt; .001***</b> |
|                 | Chronological Age                   | 1        | 100          | 0.10         | .752                |
|                 | <b>Group × Context</b>              | <b>4</b> | <b>14715</b> | <b>4.53</b>  | <b>&lt; .01**</b>   |
|                 | Group × Chronological Age           | 4        | 102          | 0.48         | .749                |
|                 | Context × Chronological Age         | 1        | 14710        | 2.95         | .086                |
|                 | Group × Context × Chronological Age | 4        | 14712        | 1.35         | .250                |
| Pitch curvature | Group                               | 4        | 139          | 1.32         | .266                |
|                 | <b>Context</b>                      | <b>1</b> | <b>12116</b> | <b>3.10</b>  | <b>&lt; .05*</b>    |
|                 | Chronological Age                   | 1        | 134          | 1.38         | .243                |
|                 | Group × Context                     | 4        | 14727        | 1.12         | .346                |
|                 | Group × Chronological Age           | 4        | 138          | 1.09         | .365                |
|                 | Context × Chronological Age         | 1        | 14718        | 1.53         | .216                |
|                 | Group × Context × Chronological Age | 4        | 14723        | 0.79         | .534                |

*Note.* NH = normal hearing; CI = cochlear implant.
