# Supplementary material
Source: publisher figshare collection journal article supplement (https://asha.figshare.com/articles/dataset/_/8038889)
Supplement: Supplementary file 5 [file 1]

### Supplemental Material S39. Additional analysis of Syllable 1 (carrying T1-4) in each neutral tone word of experiment 2.

Given that in experiment 1 (lexical tones) there were only four test items (one token for each lexical tone), we performed an additional analysis on syllable 1 of the neutral tone words used to validate the results of experiment 1. Recall that the only early implanted children produced lexical tone pitch contours comparable to those of NH children, while other children, including those with longer CI experience, produced flatter pitch for all tones.

A linear mixed-effects model was performed on the pitch contour parameters (slope and curvature) of Syllable 1 of neutral tone words, with two fixed factors “Group” (NH = 3, CI\_Imp 1-2, CI\_Imp 2-3, CI\_Imp 3-4, and CI\_Imp 4-5) and “Tones” (T1, T2, T3, and T4), a covariant “Chronological age” (age in months; to control for the different chronological ages across participants) and a random factor “Participant”. The results showed significant interactions of “Group × Tone” on pitch slope ( $F(12, 12019) = 18.71, p < .001$ ) and curvature ( $F(12, 11999) = 5.15, p < .001$ ; Table S39-1). Tukey-HSD post-hoc tests showed that the CI\_Imp 1-2 group produced pitch contours comparable to those of the NH children for all lexical tones, while other CI groups differed from the NH children in T2, T3, and T4 productions, with flatter pitch contours (Table S39-2).

**Table S39-1.** Results of linear mixed-effects model on pitch shape (slope and curvature) in children’s productions of Syllable 1 (lexical tones) of neutral tone words, with two fixed factors “Group” (NH = 3, CI\_Imp 1-2, CI\_Imp 2-3, CI\_Imp 3-4, and CI\_Imp 4-5) and “Tones” (T1, T2, T3, and T4) and a covariate “Chronological Age.”

| Parameter       | Factors                          | df 1      | df 2         | <i>F</i>     | <i>p</i>            |
|-----------------|----------------------------------|-----------|--------------|--------------|---------------------|
| Pitch slope     | <b>Group</b>                     | <b>4</b>  | <b>188</b>   | <b>4.17</b>  | <b>&lt; .01**</b>   |
|                 | <b>Tone</b>                      | <b>3</b>  | <b>8903</b>  | <b>15.03</b> | <b>&lt; .001***</b> |
|                 | Chronological Age                | 1         | 227          | 0.91         | .341                |
|                 | <b>Group × Tone</b>              | <b>12</b> | <b>12019</b> | <b>18.71</b> | <b>&lt; .001***</b> |
|                 | Group × Chronological Age        | 4         | 191          | 1.18         | .321                |
|                 | Tone × Chronological Age         | 3         | 7009         | 1.76         | .152                |
|                 | Group × Tone × Chronological Age | 12        | 7772         | 1.68         | .064                |
| Pitch curvature | <b>Group</b>                     | <b>4</b>  | <b>1548</b>  | <b>4.47</b>  | <b>&lt; .01**</b>   |
|                 | <b>Tone</b>                      | <b>3</b>  | <b>11868</b> | <b>5.66</b>  | <b>&lt; .001***</b> |
|                 | Chronological Age                | 1         | 2053         | 1.07         | .301                |
|                 | <b>Group × Tone</b>              | <b>12</b> | <b>11999</b> | <b>5.15</b>  | <b>&lt; .001***</b> |
|                 | Group × Chronological Age        | 4         | 1571         | 1.43         | .220                |
|                 | Tone × Chronological Age         | 3         | 11760        | 0.82         | .484                |
|                 | Group × Tone × Chronological Age | 12        | 11730        | 0.72         | .733                |

**Table S39-2.** Pairwise comparisons of pitch contours of syllable 1 (TX) of neutral tone words between groups (NH = 3, CI\_Imp 1-2, CI\_Imp 2-3, CI\_Imp 3-4, and CI\_Imp 4-5).

| Tone | Group difference               | Parameter        | $\beta$     | $SE$        | $df$        | $t$         | $p$                 |
|------|--------------------------------|------------------|-------------|-------------|-------------|-------------|---------------------|
| T1   | NH = 3 – CI_Imp 1-2            | Slope            | 1.43        | 1.07        | 661         | 1.34        | .666                |
|      |                                | Curvature        | 0.70        | 0.83        | 8508        | 0.84        | .917                |
|      | NH = 3 – CI_Imp 2-3            | Slope            | 1.31        | 0.57        | 514         | 2.32        | .142                |
|      |                                | Curvature        | –0.17       | 0.43        | 7740        | –0.39       | .995                |
|      | NH = 3 – CI_Imp 3-4            | Slope            | 1.55        | 0.66        | 482         | 2.36        | .130                |
|      |                                | Curvature        | –0.24       | 0.49        | 7545        | –0.48       | .989                |
|      | NH = 3 – CI_Imp 4-5            | Slope            | 1.08        | 0.86        | 504         | 1.26        | .716                |
|      |                                | Curvature        | –0.09       | 0.65        | 7607        | –0.14       | 1.000               |
|      | CI_Imp 1-2 – CI_Imp 2-3        | Slope            | –0.12       | 1.16        | 643         | –0.10       | 1.000               |
|      |                                | Curvature        | –0.86       | 0.90        | 8434        | –0.96       | .873                |
|      | CI_Imp 1-2 – CI_Imp 3-4        | Slope            | 0.12        | 1.21        | 619         | 0.10        | 1.000               |
|      |                                | Curvature        | –0.93       | 0.93        | 8330        | –1.00       | .854                |
|      | CI_Imp 1-2 – CI_Imp 4-5        | Slope            | –0.35       | 1.33        | 603         | –0.26       | .999                |
|      |                                | Curvature        | –0.79       | 1.02        | 8221        | –0.77       | .939                |
|      | CI_Imp 2-3 – CI_Imp 3-4        | Slope            | 0.23        | 0.80        | 505         | 0.29        | .998                |
|      |                                | Curvature        | –0.07       | 0.60        | 7703        | –0.12       | 1.000               |
|      | CI_Imp 2-3 – CI_Imp 4-5        | Slope            | –0.23       | 0.97        | 515         | –0.24       | .999                |
|      |                                | Curvature        | 0.08        | 0.73        | 7699        | 0.10        | 1.000               |
|      | CI_Imp 3-4 – CI_Imp 4-5        | Slope            | –0.46       | 1.03        | 501         | –0.45       | .991                |
|      |                                | Curvature        | 0.15        | 0.77        | 7625        | 0.19        | 1.000               |
| T2   | NH = 3 – CI_Imp 1-2            | Slope            | 0.37        | 1.04        | 735         | 0.35        | .997                |
|      |                                | Curvature        | 1.64        | 0.83        | 9076        | 1.98        | .277                |
|      | <b>NH = 3 – CI_Imp 2-3</b>     | <b>Slope</b>     | <b>1.26</b> | <b>0.58</b> | <b>579</b>  | <b>2.17</b> | <b>&lt; .05*</b>    |
|      |                                | <b>Curvature</b> | <b>2.64</b> | <b>0.45</b> | <b>8249</b> | <b>5.90</b> | <b>&lt; .001***</b> |
|      | <b>NH = 3 – CI_Imp 3-4</b>     | <b>Slope</b>     | <b>2.21</b> | <b>0.70</b> | <b>601</b>  | <b>3.15</b> | <b>&lt; .05*</b>    |
|      |                                | <b>Curvature</b> | <b>2.12</b> | <b>0.54</b> | <b>8339</b> | <b>3.91</b> | <b>&lt; .001***</b> |
|      | <b>NH = 3 – CI_Imp 4-5</b>     | <b>Slope</b>     | <b>2.10</b> | <b>0.87</b> | <b>554</b>  | <b>2.42</b> | <b>&lt; .05*</b>    |
|      |                                | <b>Curvature</b> | <b>2.30</b> | <b>0.66</b> | <b>8012</b> | <b>3.47</b> | <b>&lt; .01**</b>   |
|      | <b>CI_Imp 1-2 – CI_Imp 2-3</b> | <b>Slope</b>     | <b>2.89</b> | <b>1.14</b> | <b>721</b>  | <b>1.78</b> | <b>&lt; .05*</b>    |
|      |                                | Curvature        | 1.00        | 0.91        | 9012        | 1.10        | .806                |
|      | <b>CI_Imp 1-2 – CI_Imp 3-4</b> | <b>Slope</b>     | <b>1.84</b> | <b>1.21</b> | <b>714</b>  | <b>1.52</b> | <b>.547</b>         |
|      |                                | Curvature        | 0.48        | 0.96        | 8963        | 0.50        | .987                |
|      | CI_Imp 1-2 – CI_Imp 4-5        | Slope            | 1.74        | 1.32        | 668         | 1.32        | .679                |
|      |                                | Curvature        | 0.66        | 1.03        | 8737        | 0.64        | .968                |
|      | <b>CI_Imp 2-3 – CI_Imp 3-4</b> | <b>Slope</b>     | <b>2.95</b> | <b>0.85</b> | <b>619</b>  | <b>2.12</b> | <b>&lt; .05*</b>    |
|      |                                | Curvature        | –0.52       | 0.66        | 8451        | –0.79       | .933                |

|    |                                |                  |              |             |             |              |                     |
|----|--------------------------------|------------------|--------------|-------------|-------------|--------------|---------------------|
|    | CI_Imp 2-3 – CI_Imp 4-5        | Slope            | 0.84         | 0.99        | 576         | 0.85         | .914                |
|    |                                | Curvature        | –0.33        | 0.76        | 8171        | –0.44        | .992                |
|    | CI_Imp 3-4 – CI_Imp 4-5        | Slope            | –0.11        | 1.07        | 586         | –0.10        | 1.000               |
|    |                                | Curvature        | 0.19         | 0.82        | 8221        | 0.23         | .999                |
|    | NH = 3 – CI_Imp 1-2            | Slope            | –1.67        | 1.04        | 594         | –1.61        | .490                |
|    |                                | Curvature        | 0.82         | 0.79        | 8071        | 1.03         | .841                |
|    | <b>NH = 3 – CI_Imp 2-3</b>     | <b>Slope</b>     | <b>–3.61</b> | <b>0.57</b> | <b>514</b>  | <b>–6.36</b> | <b>&lt; .001***</b> |
|    |                                | Curvature        | –0.58        | 0.43        | 7740        | –1.36        | .657                |
|    | <b>NH = 3 – CI_Imp 3-4</b>     | <b>Slope</b>     | <b>–3.90</b> | <b>0.66</b> | <b>482</b>  | <b>–5.94</b> | <b>&lt; .001***</b> |
|    |                                | Curvature        | –0.22        | 0.49        | 7545        | –0.44        | .992                |
|    | <b>NH = 3 – CI_Imp 4-5</b>     | <b>Slope</b>     | <b>–4.11</b> | <b>0.86</b> | <b>504</b>  | <b>–4.78</b> | <b>&lt; .001***</b> |
|    |                                | Curvature        | –0.22        | 0.65        | 7607        | –0.34        | .997                |
| T3 | <b>CI_Imp 1-2 – CI_Imp 2-3</b> | <b>Slope</b>     | <b>–1.94</b> | <b>1.13</b> | <b>587</b>  | <b>–1.91</b> | <b>&lt; .05*</b>    |
|    |                                | Curvature        | –1.40        | 0.87        | 8063        | –1.61        | .488                |
|    | <b>CI_Imp 1-2 – CI_Imp 3-4</b> | <b>Slope</b>     | <b>–2.23</b> | <b>1.18</b> | <b>569</b>  | <b>–1.89</b> | <b>&lt; .05*</b>    |
|    |                                | Curvature        | –1.03        | 0.90        | 7980        | –1.15        | .781                |
|    | CI_Imp 1-2 – CI_Imp 4-5        | Slope            | –2.44        | 1.30        | 563         | –1.87        | .334                |
|    |                                | Curvature        | –1.04        | 0.99        | 7928        | –1.05        | .834                |
|    | CI_Imp 2-3 – CI_Imp 3-4        | Slope            | –0.29        | 0.80        | 505         | –0.37        | .996                |
|    |                                | Curvature        | 0.36         | 0.60        | 7703        | 0.60         | .975                |
|    | CI_Imp 2-3 – CI_Imp 4-5        | Slope            | –0.51        | 0.97        | 515         | –0.52        | .985                |
|    |                                | Curvature        | 0.36         | 0.73        | 7699        | 0.49         | .988                |
|    | CI_Imp 3-4 – CI_Imp 4-5        | Slope            | –0.21        | 1.03        | 501         | –0.21        | 1.000               |
|    |                                | Curvature        | 0.00         | 0.77        | 7625        | –0.01        | 1.000               |
|    | NH = 3 – CI_Imp 1-2            | Slope            | –2.06        | 1.04        | 595         | –1.99        | .274                |
|    |                                | Curvature        | –0.84        | 0.79        | 8081        | –1.06        | .826                |
|    | <b>NH = 3 – CI_Imp 2-3</b>     | <b>Slope</b>     | <b>–2.40</b> | <b>0.57</b> | <b>507</b>  | <b>–4.25</b> | <b>&lt; .001***</b> |
|    |                                | <b>Curvature</b> | <b>–0.87</b> | <b>0.43</b> | <b>7679</b> | <b>–2.04</b> | <b>&lt; .05*</b>    |
|    | <b>NH = 3 – CI_Imp 3-4</b>     | <b>Slope</b>     | <b>–2.66</b> | <b>0.66</b> | <b>485</b>  | <b>–4.04</b> | <b>&lt; .001***</b> |
|    |                                | Curvature        | –0.91        | 0.49        | 7573        | –1.84        | .351                |
| T4 | <b>NH = 3 – CI_Imp 4-5</b>     | <b>Slope</b>     | <b>–2.14</b> | <b>0.86</b> | <b>506</b>  | <b>–2.49</b> | <b>&lt; .05*</b>    |
|    |                                | Curvature        | –0.29        | 0.65        | 7623        | –0.45        | .992                |
|    | CI_Imp 1-2 – CI_Imp 2-3        | Slope            | –0.34        | 1.13        | 584         | –0.30        | .998                |
|    |                                | Curvature        | –0.03        | 0.86        | 8040        | –0.03        | 1.000               |
|    | CI_Imp 1-2 – CI_Imp 3-4        | Slope            | –0.60        | 1.18        | 569         | –0.51        | .987                |
|    |                                | Curvature        | –0.07        | 0.90        | 7980        | –0.07        | 1.000               |
|    | CI_Imp 1-2 – CI_Imp 4-5        | Slope            | –0.08        | 1.30        | 563         | –0.06        | 1.000               |
|    |                                | Curvature        | 0.55         | 0.99        | 7928        | 0.56         | .981                |

|                         |           |       |      |      |       |       |
|-------------------------|-----------|-------|------|------|-------|-------|
| CI_Imp 2-3 – CI_Imp 3-4 | Slope     | –0.26 | 0.80 | 499  | –0.33 | .998  |
|                         | Curvature | –0.04 | 0.60 | 7654 | –0.07 | 1.000 |
| CI_Imp 2-3 – CI_Imp 4-5 | Slope     | 0.26  | 0.97 | 511  | 0.27  | .999  |
|                         | Curvature | 0.58  | 0.73 | 7666 | 0.79  | .934  |
| CI_Imp 3-4 – CI_Imp 4-5 | Slope     | 0.52  | 1.03 | 501  | 0.51  | .987  |
|                         | Curvature | 0.62  | 0.77 | 7625 | 0.80  | .931  |

Note. NH = normal hearing; CI = cochlear implant.

We then explored the effect of CI experience on the pitch realization of children’s productions of Syllable 1 of neutral tone words. A linear mixed-effects model was performed on the pitch contour (slope and curvature) for each token, with two fixed factors “Group” (CI\_Exp < 1, CI\_Exp 1-2, CI\_Exp 2-3, CI\_Exp 3-4, NH = 3) and “Tones” (T1, T2, T3, and T4), a covariant “Chronological age” and a random factor “Participant”. The results showed significant interactions of “Group × Tone” on pitch slope ( $F(12, 11989) = 19.38, p < .001$ ) and curvature ( $F(12, 11998) = 5.17, p < .001$ ; Table S39-3). Tukey-HSD post-hoc tests revealed that, relative to the NH children, all CI groups generally produced flatter pitch contours for T2, T3, and T4 (Table S39-4).

**Table S39-3.** Results of linear mixed-effects model on pitch shape (slope and curvature) in children’s productions of Syllable 1 (lexical tones) of neutral tone words, with two fixed factors “Group” (NH = 3, CI\_Exp < 1, CI\_Exp 1-2, CI\_Exp 2-3, and CI\_Exp 3-4) and “Tones” (T1, T2, T3, and T4) and a covariate “Chronological Age.”

| Parameter       | Factors                          | df 1      | df 2         | <i>F</i>     | <i>p</i>             |
|-----------------|----------------------------------|-----------|--------------|--------------|----------------------|
| Pitch slope     | <b>Group</b>                     | <b>4</b>  | <b>175</b>   | <b>4.25</b>  | <b>&lt; 0.01**</b>   |
|                 | <b>Tone</b>                      | <b>3</b>  | <b>12006</b> | <b>13.06</b> | <b>&lt; 0.001***</b> |
|                 | Chronological Age                | 1         | 173          | 0.01         | 0.942                |
|                 | <b>Group × Tone</b>              | <b>12</b> | <b>11989</b> | <b>19.38</b> | <b>&lt; 0.001***</b> |
|                 | Group × Chronological Age        | 4         | 174          | 0.19         | 0.945                |
|                 | Tone × Chronological Age         | 3         | 12009        | 0.42         | 0.741                |
|                 | Group × Tone × Chronological Age | 12        | 11979        | 0.90         | 0.544                |
| Pitch curvature | <b>Group</b>                     | <b>4</b>  | <b>1381</b>  | <b>3.11</b>  | <b>&lt; 0.05*</b>    |
|                 | <b>Tone</b>                      | <b>3</b>  | <b>11948</b> | <b>3.46</b>  | <b>&lt; 0.05*</b>    |
|                 | Chronological Age                | 1         | 1353         | 0.34         | 0.558                |
|                 | <b>Group × Tone</b>              | <b>12</b> | <b>11998</b> | <b>5.17</b>  | <b>&lt; 0.001***</b> |
|                 | Group × Chronological Age        | 4         | 1353         | 0.13         | 0.970                |
|                 | Tone × Chronological Age         | 3         | 11949        | 0.12         | 0.947                |
|                 | Group × Tone × Chronological Age | 12        | 11948        | 0.21         | 0.998                |

Note. NH = normal hearing; CI = cochlear implant.

**Table S39-4.** Pairwise comparisons of pitch contours of syllable 1 (TX) of neutral tone words between groups (NH = 3, CI\_Exp < 1, CI\_Exp 1-2, CI\_Exp 2-3, and CI\_Exp 3-4).

| Tone | Group difference        | Parameter        | $\beta$      | SE          | df          | <i>t</i>     | <i>p</i>            |
|------|-------------------------|------------------|--------------|-------------|-------------|--------------|---------------------|
| T1   | NH = 3 – CI_Exp < 1     | Slope            | –0.32        | 0.95        | 502         | –0.34        | .997                |
|      |                         | Curvature        | 0.14         | 0.72        | 7771        | 0.20         | 1.000               |
|      | NH = 3 – CI_Exp 1-2     | Slope            | 0.11         | 0.97        | 498         | 0.11         | 1.000               |
|      |                         | Curvature        | 0.64         | 0.74        | 7769        | 0.87         | .909                |
|      | NH = 3 – CI_Exp 2-3     | Slope            | 0.29         | 1.31        | 576         | 0.22         | 1.000               |
|      |                         | Curvature        | 0.36         | 1.00        | 8013        | 0.36         | .996                |
|      | NH = 3 – CI_Exp 3-4     | Slope            | –1.41        | 0.82        | 478         | –1.74        | .414                |
|      |                         | Curvature        | 0.39         | 0.61        | 7593        | 0.64         | .968                |
|      | CI_Exp < 1 – CI_Exp 1-2 | Slope            | 0.43         | 0.79        | 542         | 0.54         | .983                |
|      |                         | Curvature        | 0.50         | 0.61        | 8078        | 0.82         | .925                |
|      | CI_Exp < 1 – CI_Exp 2-3 | Slope            | 0.61         | 1.18        | 622         | 0.51         | .986                |
|      |                         | Curvature        | 0.22         | 0.91        | 8203        | 0.24         | .999                |
|      | CI_Exp < 1 – CI_Exp 3-4 | Slope            | –1.10        | 0.58        | 538         | –1.88        | .332                |
|      |                         | Curvature        | 0.25         | 0.45        | 8000        | 0.56         | .981                |
|      | CI_Exp 1-2 – CI_Exp 2-3 | Slope            | 0.18         | 1.20        | 613         | 0.15         | 1.000               |
|      |                         | Curvature        | –0.28        | 0.93        | 8187        | –0.30        | .998                |
|      | CI_Exp 1-2 – CI_Exp 3-4 | Slope            | –1.53        | 0.63        | 521         | –2.43        | .109                |
|      |                         | Curvature        | –0.25        | 0.48        | 7965        | –0.51        | .986                |
|      | CI_Exp 2-3 – CI_Exp 3-4 | Slope            | –1.70        | 1.08        | 630         | –1.58        | .514                |
|      |                         | Curvature        | 0.03         | 0.83        | 8189        | 0.04         | 1.000               |
| T2   | NH = 3 – CI_Exp < 1     | <b>Slope</b>     | <b>–1.73</b> | <b>1.00</b> | <b>617</b>  | <b>–1.92</b> | <b>&lt; .05*</b>    |
|      |                         | Curvature        | 0.84         | 0.78        | 8496        | 1.08         | .819                |
|      | NH = 3 – CI_Exp 1-2     | Slope            | –0.85        | 1.03        | 595         | –0.82        | .924                |
|      |                         | <b>Curvature</b> | <b>2.52</b>  | <b>0.80</b> | <b>8365</b> | <b>2.66</b>  | <b>&lt; .05*</b>    |
|      | NH = 3 – CI_Exp 2-3     | Slope            | –0.65        | 1.26        | 603         | –0.52        | .986                |
|      |                         | <b>Curvature</b> | <b>2.64</b>  | <b>0.98</b> | <b>8502</b> | <b>2.65</b>  | <b>&lt; .05*</b>    |
|      | NH = 3 – CI_Exp 3-4     | <b>Slope</b>     | <b>–2.59</b> | <b>0.86</b> | <b>574</b>  | <b>–3.00</b> | <b>&lt; .05*</b>    |
|      |                         | <b>Curvature</b> | <b>–1.76</b> | <b>0.66</b> | <b>8238</b> | <b>–2.64</b> | <b>&lt; .05*</b>    |
|      | CI_Exp < 1 – CI_Exp 1-2 | Slope            | 0.88         | 0.83        | 652         | 1.06         | .828                |
|      |                         | Curvature        | –0.32        | 0.65        | 8694        | –0.49        | .989                |
|      | CI_Exp < 1 – CI_Exp 2-3 | Slope            | 1.08         | 1.10        | 638         | 0.98         | .865                |
|      |                         | Curvature        | –0.20        | 0.86        | 8728        | –0.23        | .999                |
|      | CI_Exp < 1 – CI_Exp 3-4 | Slope            | –0.87        | 0.61        | 655         | –1.42        | .617                |
|      |                         | <b>Curvature</b> | <b>–2.60</b> | <b>0.48</b> | <b>8725</b> | <b>–5.41</b> | <b>&lt; .001***</b> |
|      | CI_Exp 1-2 – CI_Exp 2-3 | Slope            | 0.20         | 1.12        | 618         | 0.18         | 1.000               |

|  |                                   |                  |              |             |             |              |                     |
|--|-----------------------------------|------------------|--------------|-------------|-------------|--------------|---------------------|
|  |                                   | Curvature        | 0.12         | 0.88        | 8612        | 0.13         | 1.000               |
|  | <b>CI_Exp 1-2 – CI_Exp 3-4</b>    | <b>Slope</b>     | <b>–1.75</b> | <b>0.66</b> | <b>595</b>  | <b>–2.66</b> | <b>&lt; .05*</b>    |
|  |                                   | <b>Curvature</b> | <b>–2.28</b> | <b>0.51</b> | <b>8378</b> | <b>–4.49</b> | <b>&lt; .001***</b> |
|  | <b>CI_Exp 2-3 – CI_Exp 3-4</b>    | <b>Slope</b>     | <b>–1.94</b> | <b>0.97</b> | <b>608</b>  | <b>–2.00</b> | <b>&lt; .05*</b>    |
|  |                                   | <b>Curvature</b> | <b>–2.40</b> | <b>0.76</b> | <b>8597</b> | <b>–3.15</b> | <b>&lt; .05*</b>    |
|  | <b>NH = 3 – CI_Exp &lt; 1</b>     | <b>Slope</b>     | <b>–2.17</b> | <b>0.95</b> | <b>502</b>  | <b>–2.24</b> | <b>&lt; .05*</b>    |
|  |                                   | Curvature        | –0.15        | 0.72        | 7771        | –0.21        | 1.000               |
|  | <b>NH = 3 – CI_Exp 1-2</b>        | <b>Slope</b>     | <b>2.26</b>  | <b>0.97</b> | <b>486</b>  | <b>2.33</b>  | <b>&lt; .05*</b>    |
|  |                                   | Curvature        | 0.92         | 0.73        | 7661        | 1.26         | .718                |
|  | <b>NH = 3 – CI_Exp 2-3</b>        | <b>Slope</b>     | <b>2.17</b>  | <b>1.34</b> | <b>625</b>  | <b>2.17</b>  | <b>&lt; .05*</b>    |
|  |                                   | Curvature        | 0.25         | 1.04        | 8338        | 0.24         | .999                |
|  | <b>NH = 3 – CI_Exp 3-4</b>        | <b>Slope</b>     | <b>4.00</b>  | <b>0.82</b> | <b>478</b>  | <b>4.90</b>  | <b>&lt; .001***</b> |
|  |                                   | <b>Curvature</b> | <b>0.54</b>  | <b>0.61</b> | <b>7594</b> | <b>0.88</b>  | <b>.904</b>         |
|  | <b>CI_Exp &lt; 1 – CI_Exp 1-2</b> | <b>Slope</b>     | <b>3.43</b>  | <b>0.78</b> | <b>523</b>  | <b>4.38</b>  | <b>&lt; .001***</b> |
|  |                                   | Curvature        | 1.07         | 0.60        | 7923        | 1.80         | .377                |
|  | <b>CI_Exp &lt; 1 – CI_Exp 2-3</b> | <b>Slope</b>     | <b>2.35</b>  | <b>1.22</b> | <b>687</b>  | <b>1.93</b>  | <b>.302</b>         |
|  |                                   | Curvature        | 0.41         | 0.95        | 8580        | 0.43         | .993                |
|  | <b>CI_Exp &lt; 1 – CI_Exp 3-4</b> | <b>Slope</b>     | <b>5.17</b>  | <b>0.58</b> | <b>538</b>  | <b>8.85</b>  | <b>&lt; .001***</b> |
|  |                                   | Curvature        | 0.69         | 0.45        | 8000        | 1.56         | .526                |
|  | <b>CI_Exp 1-2 – CI_Exp 2-3</b>    | <b>Slope</b>     | <b>–1.09</b> | <b>1.23</b> | <b>665</b>  | <b>–0.88</b> | <b>.904</b>         |
|  |                                   | Curvature        | –0.67        | 0.96        | 8497        | –0.70        | .958                |
|  | <b>CI_Exp 1-2 – CI_Exp 3-4</b>    | <b>Slope</b>     | <b>1.74</b>  | <b>0.62</b> | <b>491</b>  | <b>2.81</b>  | <b>.041</b>         |
|  |                                   | Curvature        | –0.38        | 0.47        | 7710        | –0.81        | .929                |
|  | <b>CI_Exp 2-3 – CI_Exp 3-4</b>    | <b>Slope</b>     | <b>2.83</b>  | <b>1.12</b> | <b>709</b>  | <b>2.53</b>  | <b>.085</b>         |
|  |                                   | Curvature        | 0.29         | 0.87        | 8636        | 0.33         | .997                |
|  | <b>NH = 3 – CI_Exp &lt; 1</b>     | <b>Slope</b>     | <b>–2.60</b> | <b>0.95</b> | <b>502</b>  | <b>–2.63</b> | <b>&lt; .05*</b>    |
|  |                                   | Curvature        | –0.08        | 0.72        | 7771        | –0.12        | 1.000               |
|  | <b>NH = 3 – CI_Exp 1-2</b>        | <b>Slope</b>     | <b>–2.21</b> | <b>0.97</b> | <b>486</b>  | <b>–2.22</b> | <b>&lt; .05*</b>    |
|  |                                   | Curvature        | –0.29        | 0.73        | 7661        | –0.40        | .995                |
|  | <b>NH = 3 – CI_Exp 2-3</b>        | <b>Slope</b>     | <b>2.04</b>  | <b>1.31</b> | <b>576</b>  | <b>–2.03</b> | <b>&lt; .05*</b>    |
|  |                                   | Curvature        | –0.90        | 1.00        | 8013        | –0.90        | .898                |
|  | <b>NH = 3 – CI_Exp 3-4</b>        | <b>Slope</b>     | <b>2.09</b>  | <b>0.82</b> | <b>480</b>  | <b>2.56</b>  | <b>&lt; .05*</b>    |
|  |                                   | Curvature        | 0.57         | 0.62        | 7611        | 0.92         | .890                |
|  | <b>CI_Exp &lt; 1 – CI_Exp 1-2</b> | <b>Slope</b>     | <b>0.39</b>  | <b>0.78</b> | <b>523</b>  | <b>0.50</b>  | <b>.987</b>         |
|  |                                   | Curvature        | –0.21        | 0.60        | 7923        | –0.35        | .997                |
|  | <b>CI_Exp &lt; 1 – CI_Exp 2-3</b> | <b>Slope</b>     | <b>0.56</b>  | <b>1.18</b> | <b>622</b>  | <b>0.47</b>  | <b>.990</b>         |
|  |                                   | Curvature        | –0.21        | 0.60        | 7923        | –0.35        | .997                |

|                                   |              |             |             |            |             |                     |
|-----------------------------------|--------------|-------------|-------------|------------|-------------|---------------------|
|                                   | Curvature    | −0.81       | 0.91        | 8203       | −0.90       | .899                |
| <b>CI_Exp &lt; 1 – CI_Exp 3-4</b> | <b>Slope</b> | <b>2.69</b> | <b>0.59</b> | <b>542</b> | <b>4.60</b> | <b>&lt; .001***</b> |
|                                   | Curvature    | 0.65        | 0.45        | 8032       | 1.45        | .594                |
| <b>CI_Exp 1-2 – CI_Exp 2-3</b>    | <b>Slope</b> | <b>0.17</b> | <b>1.20</b> | <b>603</b> | <b>0.14</b> | <b>1.000</b>        |
|                                   | Curvature    | −0.61       | 0.92        | 8123       | −0.66       | .965                |
| <b>CI_Exp 1-2 – CI_Exp 3-4</b>    | <b>Slope</b> | <b>2.30</b> | <b>0.62</b> | <b>495</b> | <b>3.71</b> | <b>&lt; .01**</b>   |
|                                   | Curvature    | 0.86        | 0.47        | 7740       | 1.83        | .355                |
| <b>CI_Exp 2-3 – CI_Exp 3-4</b>    | <b>Slope</b> | <b>2.13</b> | <b>1.08</b> | <b>632</b> | <b>1.97</b> | <b>.280</b>         |
|                                   | Curvature    | 1.46        | 0.83        | 8198       | 1.76        | .395                |

*Note.* NH = normal hearing; CI = cochlear implant.
