# Supplementary material
Source: publisher figshare collection journal article supplement (https://asha.figshare.com/articles/dataset/_/8038889)
Supplement: Supplementary file 6 [file 1]

**Supplemental Material S12.** Results of linear regression model of lexical tone pitch slopes with different predictors: tone category (T1-4), age at implantation, CI experience, chronological age, and residual hearing. The predictors were entered into the model stepwise and the best model included all predictors.

| <b>Predictor</b>    | <b><math>\Delta R^2</math></b> | <b><i>B</i></b> | <b><i>SE (B)</i></b> | <b><math>\beta</math></b> | <b><i>p</i></b> |
|---------------------|--------------------------------|-----------------|----------------------|---------------------------|-----------------|
| Tone category       | 0.31                           | —               | —                    | —                         | —               |
| Age at implantation | 0.15                           | 0.001           | 0.002                | 0.022                     | < .01**         |
| CI experience       | 0.10                           | 0.004           | 0.002                | 0.009                     | < .05*          |
| Chronological age   | 0.09                           | -0.004          | 0.001                | -0.007                    | < .05*          |
| Residual hearing    | 0.09                           | -0.005          | 0.003                | -0.007                    | .091            |

*Note.* CI = cochlear implant.
