# Supplementary material
Source: publisher figshare collection journal article supplement (https://asha.figshare.com/articles/dataset/_/8038889)
Supplement: Supplementary file 7 [file 1]

**Supplemental Material S8.** Results of linear mixed-effects model on pitch shape (slope and curvature) in children’s lexical tone productions, with two fixed factors “Group” (NH = 3, CI\_Exp < 1, CI\_Exp 1-2, CI\_Exp 2-3, and CI\_Exp 3-4) and “Tones” (T1, T2, T3, and T4) and a covariate “Chronological Age.”

| Parameter       | Factors                          | df 1      | df 2        | <i>F</i>     | <i>p</i>            |
|-----------------|----------------------------------|-----------|-------------|--------------|---------------------|
| Pitch slope     | <b>Group</b>                     | <b>4</b>  | <b>146</b>  | <b>3.75</b>  | <b>&lt; .01**</b>   |
|                 | <b>Tone</b>                      | <b>3</b>  | <b>5890</b> | <b>12.39</b> | <b>&lt; .001***</b> |
|                 | Chronological Age                | 1         | 146         | 3.21         | .075                |
|                 | <b>Group × Tone</b>              | <b>12</b> | <b>5897</b> | <b>2.20</b>  | <b>&lt; .05*</b>    |
|                 | Group × Chronological Age        | 4         | 146         | 1.70         | .153                |
|                 | Tone × Chronological Age         | 3         | 5882        | 0.89         | .445                |
|                 | Group × Tone × Chronological Age | 12        | 5894        | 1.53         | .106                |
| Pitch curvature | <b>Group</b>                     | <b>4</b>  | <b>152</b>  | <b>2.83</b>  | <b>&lt; .05*</b>    |
|                 | <b>Tone</b>                      | <b>3</b>  | <b>5892</b> | <b>16.27</b> | <b>&lt; .001***</b> |
|                 | Chronological Age                | 1         | 151         | 2.15         | .145                |
|                 | <b>Group × Tone</b>              | <b>12</b> | <b>5900</b> | <b>2.02</b>  | <b>&lt; .05*</b>    |
|                 | Group × Chronological Age        | 4         | 152         | 2.2          | .072                |
|                 | Tone × Chronological Age         | 3         | 5882        | 1.46         | .223                |
|                 | Group × Tone × Chronological Age | 12        | 5897        | 1.69         | .062                |

*Note.* NH = normal hearing; CI = cochlear implant.
