# Supplementary material
Source: publisher figshare collection journal article supplement (https://asha.figshare.com/articles/dataset/_/8038889)
Supplement: Supplementary file 8 [file 1]

**Supplemental Material S34.** Pairwise comparisons of pitch slope of trisyllabic tone sandhi compounds (Syllables 1 and 2) between groups (NH = 3, CI\_Imp 1-2, CI\_Imp 2-3, CI\_Imp 3-4, and CI\_Imp 4-5) for each sandhi context (double-T3 and triple-T3).

| Context   | Group difference        | Syllable   | Parameter | $\beta$ | SE   | df   | $t$    | $p$       |
|-----------|-------------------------|------------|-----------|---------|------|------|--------|-----------|
| Double-T3 | NH = 3 – CI_Imp 1-2     | Syllable 1 | Slope     | 2.11    | 0.78 | 188  | 2.72   | < .05*    |
|           |                         | Syllable 2 | Slope     | –8.87   | 1.23 | 195  | –7.18  | < .001*** |
|           |                         |            | Curvature | 0.34    | 0.74 | 850  | 0.45   | .991      |
|           | NH = 3 – CI_Imp 2-3     | Syllable 1 | Slope     | 4.39    | 0.49 | 175  | 9.01   | < .001*** |
|           |                         | Syllable 2 | Slope     | –8.48   | 0.77 | 179  | –11.04 | < .001*** |
|           |                         |            | Curvature | 0.19    | 0.45 | 738  | 0.43   | .993      |
|           | NH = 3 – CI_Imp 3-4     | Syllable 1 | Slope     | 4.57    | 0.58 | 177  | 7.94   | < .001*** |
|           |                         | Syllable 2 | Slope     | –7.9    | 0.91 | 181  | –8.69  | < .001*** |
|           |                         |            | Curvature | 0.35    | 0.54 | 756  | 0.66   | .965      |
|           | NH = 3 – CI_Imp 4-5     | Syllable 1 | Slope     | 3.7     | 0.68 | 172  | 5.48   | < .001*** |
|           |                         | Syllable 2 | Slope     | –9.35   | 1.06 | 175  | –8.78  | < .001*** |
|           |                         |            | Curvature | –0.78   | 0.62 | 706  | –1.26  | .715      |
|           | CI_Imp 1-2 – CI_Imp 2-3 | Syllable 1 | Slope     | 2.27    | 0.88 | 185  | 2.59   | < .05*    |
|           |                         | Syllable 2 | Slope     | 0.38    | 1.39 | 191  | 0.27   | .999      |
|           |                         |            | Curvature | –0.14   | 0.84 | 827  | –0.17  | 1.000     |
|           | CI_Imp 1-2 – CI_Imp 3-4 | Syllable 1 | Slope     | 2.46    | 0.93 | 185  | 2.64   | < .05*    |
|           |                         | Syllable 2 | Slope     | 0.97    | 1.47 | 191  | 0.66   | .965      |
|           |                         |            | Curvature | 0.02    | 0.88 | 824  | 0.02   | 1.000     |
|           | CI_Imp 1-2 – CI_Imp 4-5 | Syllable 1 | Slope     | 1.59    | 1    | 182  | 1.6    | .502      |
|           |                         | Syllable 2 | Slope     | –0.48   | 1.58 | 187  | –0.31  | .998      |
|           |                         |            | Curvature | –1.12   | 0.94 | 791  | –1.19  | .756      |
|           | CI_Imp 2-3 – CI_Imp 3-4 | Syllable 1 | Slope     | 0.19    | 0.71 | 176  | 0.26   | .999      |
|           |                         | Syllable 2 | Slope     | 0.59    | 1.11 | 180  | 0.53   | .985      |
|           |                         |            | Curvature | 0.16    | 0.66 | 752  | 0.25   | .999      |
|           | CI_Imp 2-3 – CI_Imp 4-5 | Syllable 1 | Slope     | –0.68   | 0.79 | 173  | –0.87  | .909      |
|           |                         | Syllable 2 | Slope     | –0.86   | 1.24 | 176  | –0.69  | .958      |
|           |                         |            | Curvature | –0.97   | 0.73 | 716  | –1.34  | .664      |
|           | CI_Imp 3-4 – CI_Imp 4-5 | Syllable 1 | Slope     | –0.87   | 0.85 | 174  | –1.03  | .843      |
|           |                         | Syllable 2 | Slope     | –1.45   | 1.34 | 178  | –1.09  | .814      |
|           |                         |            | Curvature | –1.14   | 0.78 | 727  | –1.45  | .594      |
| Triple-T3 | NH = 3 – CI_Imp 1-2     | Syllable 1 | Slope     | 2.58    | 0.91 | 360  | 2.82   | < .05*    |
|           |                         | Syllable 2 | Slope     | 1.94    | 1.52 | 447  | 1.28   | .705      |
|           |                         |            | Curvature | –2.75   | 1.16 | 3104 | –2.36  | < .05*    |
|           | NH = 3 – CI_Imp 2-3     | Syllable 1 | Slope     | 4.24    | 0.59 | 379  | 7.16   | < .001*** |
|           |                         | Syllable 2 | Slope     | –0.44   | 0.99 | 471  | –0.45  | .992      |

|                         |            |           |             |             |             |             |                     |
|-------------------------|------------|-----------|-------------|-------------|-------------|-------------|---------------------|
|                         |            | Curvature | 1.40        | 0.76        | 3183        | 1.84        | .353                |
| NH = 3 – CI_Imp 3-4     | Syllable 1 | Slope     | <b>3.91</b> | <b>0.69</b> | <b>360</b>  | <b>5.68</b> | <b>&lt; .001***</b> |
|                         | Syllable 2 | Slope     | 0.6         | 1.14        | 447         | 0.53        | .985                |
|                         |            | Curvature | 1.68        | 0.88        | 3106        | 1.91        | .310                |
| NH = 3 – CI_Imp 4-5     | Syllable 1 | Slope     | <b>3.2</b>  | <b>0.81</b> | <b>360</b>  | <b>3.93</b> | <b>&lt; .001***</b> |
|                         | Syllable 2 | Slope     | 0.4         | 1.35        | 447         | 0.3         | .998                |
|                         |            | Curvature | 1.33        | 1.04        | 3105        | 1.28        | .704                |
| CI_Imp 1-2 – CI_Imp 2-3 | Syllable 1 | Slope     | 1.66        | 1.04        | 365         | 1.6         | .5                  |
|                         | Syllable 2 | Slope     | –2.38       | 1.73        | 453         | –1.38       | .643                |
|                         |            | Curvature | <b>4.15</b> | <b>1.33</b> | <b>3127</b> | <b>3.12</b> | <b>&lt; .05*</b>    |
| CI_Imp 1-2 – CI_Imp 3-4 | Syllable 1 | Slope     | 1.33        | 1.1         | 360         | 1.21        | .743                |
|                         | Syllable 2 | Slope     | –1.34       | 1.82        | 446         | –0.74       | .948                |
|                         |            | Curvature | <b>4.43</b> | <b>1.40</b> | <b>3102</b> | <b>3.17</b> | <b>&lt; .05*</b>    |
| CI_Imp 1-2 – CI_Imp 4-5 | Syllable 1 | Slope     | 0.62        | 1.18        | 360         | 0.53        | .985                |
|                         | Syllable 2 | Slope     | –1.54       | 1.96        | 446         | –0.79       | .934                |
|                         |            | Curvature | <b>4.07</b> | <b>1.50</b> | <b>3102</b> | <b>2.71</b> | <b>&lt; .05*</b>    |
| CI_Imp 2-3 – CI_Imp 3-4 | Syllable 1 | Slope     | –0.33       | 0.85        | 368         | –0.39       | .995                |
|                         | Syllable 2 | Slope     | 1.04        | 1.41        | 457         | 0.74        | .948                |
|                         |            | Curvature | 0.28        | 1.09        | 3139        | 0.26        | .999                |
| CI_Imp 2-3 – CI_Imp 4-5 | Syllable 1 | Slope     | –1.04       | 0.95        | 366         | –1.09       | .81                 |
|                         | Syllable 2 | Slope     | 0.84        | 1.58        | 455         | 0.53        | .984                |
|                         |            | Curvature | –0.07       | 1.22        | 3131        | –0.06       | 1.000               |
| CI_Imp 3-4 – CI_Imp 4-5 | Syllable 1 | Slope     | –0.71       | 1.02        | 360         | –0.7        | .956                |
|                         | Syllable 2 | Slope     | –0.2        | 1.69        | 446         | –0.12       | 1.000               |
|                         |            | Curvature | –0.35       | 1.29        | 3102        | –0.27       | .999                |

*Note.* NH = normal hearing; CI = cochlear implant.
