# Supplementary material
Source: publisher figshare collection journal article supplement (https://asha.figshare.com/articles/dataset/_/8038889)
Supplement: Supplementary file 9 [file 1]

**Supplemental Material S10.** Results of one-way analysis of variance (ANOVA) on pitch range in children's lexical tone productions, with an independent variable "Group" (NH = 3, CI\_Exp < 1, CI\_Exp 1-2, CI\_Exp 2-3, and CI\_Exp 3-4) and a covariate "Chronological Age."

| <b>Factor</b>             | <b>df</b> | <b>F</b>    | <b>p</b>         |
|---------------------------|-----------|-------------|------------------|
| <b>Group</b>              | <b>4</b>  | <b>2.93</b> | <b>&lt; .05*</b> |
| Chronological Age         | 1         | 1.44        | .233             |
| Group × Chronological Age | 4         | 0.34        | .852             |
| Residuals                 | 141       |             |                  |

*Note.* NH = normal hearing; CI = cochlear implant.
