# Supplementary material
Source: publisher figshare collection journal article supplement (https://asha.figshare.com/articles/dataset/_/8038889)
Supplement: Supplementary file 10 [file 1]

**Supplemental Material S18.** Results of linear mixed-effects model on pitch shape (slope and curvature) in children's neutral tone productions, with three fixed factors "Group" (NH = 3, CI\_Exp < 1, CI\_Exp 1-2, CI\_Exp 2-3, and CI\_Exp 3-4), "Context" (after T1/2/4 and after T3) and "Type" (Reduplicatives and Possessives) and a covariate "Chronological age".

| Parameter                                  | Factors                                                                                | df 1     | df 2         | F           | p                 |
|--------------------------------------------|----------------------------------------------------------------------------------------|----------|--------------|-------------|-------------------|
| Pitch slope                                | Group                                                                                  | 4        | 198          | 1.80        | .130              |
|                                            | <b>Context</b>                                                                         | <b>1</b> | <b>11988</b> | <b>9.12</b> | <b>&lt; .01**</b> |
|                                            | <b>Type</b>                                                                            | <b>1</b> | <b>12032</b> | <b>5.28</b> | <b>&lt; .05*</b>  |
|                                            | Chronological Age                                                                      | 1        | 195          | 2.05        | .153              |
|                                            | <b>Group × Context</b>                                                                 | <b>4</b> | <b>11981</b> | <b>3.54</b> | <b>&lt; .01**</b> |
|                                            | Group × Type                                                                           | 4        | 11712        | 1.58        | .177              |
|                                            | Context × Type                                                                         | 1        | 11985        | 0.98        | .322              |
|                                            | Group × Chronological Age                                                              | 4        | 197          | 1.46        | .216              |
|                                            | Context × Chronological Age                                                            | 1        | 11983        | 2.78        | .095              |
|                                            | Type × Chronological Age                                                               | 1        | 12009        | 2.66        | .103              |
|                                            | $\hat{\text{Group}} \times \hat{\text{Context}} \times \hat{\text{Chronological Age}}$ | 4        | 11980        | 1.94        | .101              |
|                                            | Group × Type × Chronological Age                                                       | 4        | 11791        | 1.48        | .205              |
|                                            | Context × Type × Chronological age                                                     | 1        | 11982        | 0.65        | .421              |
|                                            | Group × Context × Type × Chronological Age                                             | 4        | 11979        | 0.85        | .493              |
| Pitch curvature                            | Group                                                                                  | 4        | 344          | 1.23        | .299              |
|                                            | Context                                                                                | 1        | 11959        | 0.30        | .586              |
|                                            | Type                                                                                   | 1        | 11939        | 0.31        | .576              |
|                                            | Chronological Age                                                                      | 1        | 337          | 1.34        | .248              |
|                                            | Group × Context                                                                        | 4        | 11957        | 0.11        | .980              |
|                                            | Group × Type                                                                           | 4        | 11738        | 0.84        | .499              |
|                                            | Context × Type                                                                         | 1        | 11959        | 1.09        | .297              |
|                                            | Group × Chronological Age                                                              | 4        | 341          | 0.88        | .476              |
|                                            | Context × Chronological Age                                                            | 1        | 11958        | 0.12        | .731              |
|                                            | Type × Chronological Age                                                               | 1        | 11920        | 0.36        | .550              |
|                                            | Group × Context × Type                                                                 | 4        | 11957        | 0.21        | .931              |
|                                            | Group × Context × Chronological Age                                                    | 4        | 11957        | 0.28        | .893              |
|                                            | Group × Type × Chronological Age                                                       | 4        | 11786        | 0.78        | .537              |
|                                            | Context × Type × Chronological Age                                                     | 1        | 11958        | 0.72        | .395              |
| Group × Context × Type × Chronological Age | 4                                                                                      | 11957    | 0.15         | .962        |                   |

Note. NH = normal hearing; CI = cochlear implant.
