# Supplementary material
Source: publisher figshare collection journal article supplement (https://asha.figshare.com/articles/dataset/_/8038889)
Supplement: Supplementary file 11 [file 1]

**Supplemental Material S24.** Results of linear regression model of neutral tone duration with different parameters (Context: after T1/2/4 and after T3; Type: Reduplicative and Possessive). The predictors were entered into the model stepwise and the best model included all predictors.

| Predictor           | $\Delta R^2$ | <i>B</i> | <i>SE (B)</i> | $\beta$ | <i>p</i>  |
|---------------------|--------------|----------|---------------|---------|-----------|
| Context             | 0.01         | 0.140    | 0.101         | 0.073   | .144      |
| Type                | 0.10         | −0.517   | 0.082         | −0.306  | < .001*** |
| Age at implantation | 0.09         | −0.019   | 0.093         | −0.228  | < .05*    |
| CI experience       | 0.02         | 0.011    | 0.090         | 0.138   | < .05*    |
| Chronological age   | 0.02         | 0.010    | 0.093         | 0.123   | < .05*    |
| Residual hearing    | 0.01         | −0.014   | 0.011         | −0.119  | .831      |
