# Supplementary material
Source: publisher figshare collection journal article supplement (https://asha.figshare.com/articles/dataset/_/8038889)
Supplement: Supplementary file 12 [file 1]

**Supplemental Material S17.** Pairwise comparisons of normalized duration of neutral tone syllables across types (Reduplicative and Possessive) and groups (NH = 3, CI\_Imp 1-2, CI\_Imp 2-3, CI\_Imp 3-4, and CI\_Imp 4-5).

| Type                    | Group difference           | $\beta$      | SE          | df         | t            | p                   |
|-------------------------|----------------------------|--------------|-------------|------------|--------------|---------------------|
| Reduplicative           | NH = 3 – CI_Imp 1-2        | -0.26        | 0.22        | 304        | -1.17        | .771                |
|                         | <b>NH = 3 – CI_Imp 2-3</b> | <b>-0.60</b> | <b>0.10</b> | <b>224</b> | <b>-6.19</b> | <b>&lt; .001***</b> |
|                         | <b>NH = 3 – CI_Imp 3-4</b> | <b>-0.29</b> | <b>0.14</b> | <b>195</b> | <b>-2.08</b> | <b>&lt; .05*</b>    |
|                         | <b>NH = 3 – CI_Imp 4-5</b> | <b>-0.33</b> | <b>0.28</b> | <b>189</b> | <b>-2.79</b> | <b>&lt; .05*</b>    |
|                         | CI_Imp 1-2 – CI_Imp 2-3    | -0.24        | 0.23        | 297        | -1.48        | .580                |
|                         | CI_Imp 1-2 – CI_Imp 3-4    | -0.04        | 0.25        | 270        | -0.14        | 1.000               |
|                         | CI_Imp 1-2 – CI_Imp 4-5    | 0.03         | 0.36        | 225        | 0.09         | 1.000               |
|                         | CI_Imp 2-3 – CI_Imp 3-4    | 0.31         | 0.16        | 206        | 1.93         | .307                |
|                         | CI_Imp 2-3 – CI_Imp 4-5    | 0.38         | 0.30        | 193        | 1.27         | .708                |
|                         | CI_Imp 3-4 – CI_Imp 4-5    | 0.07         | 0.31        | 190        | 0.21         | 1.000               |
| Possessive              | <b>NH = 3 – CI_Imp 1-2</b> | <b>-0.63</b> | <b>0.18</b> | <b>239</b> | <b>-3.47</b> | <b>&lt; .01**</b>   |
|                         | <b>NH = 3 – CI_Imp 2-3</b> | <b>-0.64</b> | <b>0.09</b> | <b>201</b> | <b>-6.83</b> | <b>&lt; .001***</b> |
|                         | <b>NH = 3 – CI_Imp 3-4</b> | <b>-0.90</b> | <b>0.14</b> | <b>196</b> | <b>-6.39</b> | <b>&lt; .001***</b> |
|                         | <b>NH = 3 – CI_Imp 4-5</b> | <b>-0.33</b> | <b>0.28</b> | <b>188</b> | <b>-2.75</b> | <b>&lt; .05*</b>    |
|                         | CI_Imp 1-2 – CI_Imp 2-3    | -0.01        | 0.20        | 235        | -0.04        | 1.000               |
|                         | CI_Imp 1-2 – CI_Imp 3-4    | -0.27        | 0.22        | 225        | -1.20        | .750                |
|                         | CI_Imp 1-2 – CI_Imp 4-5    | 0.31         | 0.33        | 202        | 0.92         | .889                |
|                         | CI_Imp 2-3 – CI_Imp 3-4    | -0.26        | 0.16        | 199        | -1.64        | .474                |
| CI_Imp 2-3 – CI_Imp 4-5 | 0.31                       | 0.29         | 190         | 1.07       | .822         |                     |
| CI_Imp 3-4 – CI_Imp 4-5 | 0.57                       | 0.31         | 190         | 1.84       | .352         |                     |

Note. NH = normal hearing; CI = cochlear implant.
