# Supplementary material
Source: publisher figshare collection journal article supplement (https://asha.figshare.com/articles/dataset/_/8038889)
Supplement: Supplementary file 13 [file 1]

**Supplemental Material S23.** Results of linear regression model of neutral tone pitch slopes with different parameters (Context: after T1/2/4 and after T3; Type: Reduplicative and Possessive). The predictors were entered into the model stepwise and the best model included all predictors.

| Predictor           | $\Delta R^2$ | <i>B</i> | <i>SE (B)</i> | $\beta$ | <i>p</i>  |
|---------------------|--------------|----------|---------------|---------|-----------|
| Context             | 0.16         | 0.188    | 0.025         | 0.120   | < .001*** |
| Type                | 0.04         | −0.287   | 0.022         | −0.209  | < .001*** |
| Age at implantation | 0.05         | 0.006    | 0.002         | 0.069   | < .001*** |
| CI experience       | 0.01         | −0.002   | 0.002         | −0.002  | .908      |
| Chronological age   | 0.01         | 0.006    | 0.001         | 0.010   | .641      |
| Residual hearing    | 0.01         | 0.003    | 0.003         | 0.025   | .149      |
