# Supplementary material
Source: publisher figshare collection journal article supplement (https://asha.figshare.com/articles/dataset/_/8038889)
Supplement: Supplementary file 14 [file 1]

**Supplemental Material S7.** Pairwise comparison of lexical tone pitch range between groups (NH = 3, CI\_Imp 1-2, CI\_Imp 2-3, CI\_Imp 3-4, and CI\_Imp 4-5).

| <b>Group difference</b>    | <b><math>\beta</math></b> | <b>SE</b>   | <b>df</b>  | <b><math>t</math></b> | <b><math>p</math></b> |
|----------------------------|---------------------------|-------------|------------|-----------------------|-----------------------|
| NH = 3 – CI_Imp 1-2        | 1.54                      | 2.66        | 141        | 0.55                  | .129                  |
| <b>NH = 3 – CI_Imp 2-3</b> | <b>3.36</b>               | <b>1.61</b> | <b>141</b> | <b>3.23</b>           | <b>&lt; .05*</b>      |
| <b>NH = 3 – CI_Imp 3-4</b> | <b>2.96</b>               | <b>2.30</b> | <b>141</b> | <b>2.84</b>           | <b>&lt; .05*</b>      |
| <b>NH = 3 – CI_Imp 4-5</b> | <b>4.45</b>               | <b>6.22</b> | <b>141</b> | <b>3.63</b>           | <b>&lt; .01**</b>     |
| CI_Imp 1-2 – CI_Imp 2-3    | -0.48                     | 2.91        | 141        | -0.17                 | 1.000                 |
| CI_Imp 1-2 – CI_Imp 3-4    | -0.88                     | 3.34        | 141        | -0.26                 | .999                  |
| CI_Imp 1-2 – CI_Imp 4-5    | 1.01                      | 6.67        | 141        | 0.39                  | .995                  |
| CI_Imp 2-3 – CI_Imp 3-4    | -0.40                     | 2.59        | 141        | -0.15                 | 1.000                 |
| CI_Imp 2-3 – CI_Imp 4-5    | 1.09                      | 6.33        | 141        | 0.49                  | .988                  |
| CI_Imp 3-4 – CI_Imp 4-5    | 1.48                      | 6.54        | 141        | 0.53                  | .984                  |

*Note.* NH = normal hearing; CI = cochlear implant.
