# Supplementary material
Source: publisher figshare collection journal article supplement (https://asha.figshare.com/articles/dataset/_/8038889)
Supplement: Supplementary file 15 [file 1]

**Supplemental Material S37.** Pairwise comparisons of pitch slope of trisyllabic tone sandhi compounds (Syllables 1 and 2) between groups (NH = 3, CI\_Exp < 1, CI\_Exp 1-2, CI\_Exp 2-3, and CI\_Exp 3-4) for each sandhi context (double-T3 and triple-T3).

| <b>Tone</b> | <b>Group difference</b> | <b>Parameter</b> | <b><math>\beta</math></b> | <b><i>SE</i></b> | <b>df</b> | <b><i>t</i></b> | <b><i>p</i></b> |
|-------------|-------------------------|------------------|---------------------------|------------------|-----------|-----------------|-----------------|
| Double-T3   | NH = 3 – CI_Exp < 1     | Syllable 1       | 4.13                      | 0.77             | 171       | 5.39            | < .001***       |
|             |                         | Syllable 2       | –8.00                     | 1.19             | 176       | –6.71           | < .001***       |
|             | NH = 3 – CI_Exp 1-2     | Syllable 1       | 3.97                      | 0.49             | 172       | 8.10            | < .001***       |
|             |                         | Syllable 2       | –9.25                     | 0.76             | 178       | –12.12          | < .001***       |
|             | NH = 3 – CI_Exp 2-3     | Syllable 1       | 3.49                      | 0.53             | 178       | 6.57            | < .001***       |
|             |                         | Syllable 2       | –7.53                     | 0.83             | 186       | –9.07           | < .001***       |
|             | NH = 3 – CI_Exp 3-4     | Syllable 1       | 5.21                      | 0.84             | 183       | 6.20            | < .001***       |
|             |                         | Syllable 2       | –9.58                     | 1.32             | 192       | –7.28           | < .001***       |
|             | CI_Exp < 1 – CI_Exp 1-2 | Syllable 1       | –0.16                     | 0.87             | 171       | –0.19           | 1.000           |
|             |                         | Syllable 2       | –1.25                     | 1.35             | 176       | –0.93           | .886            |
|             | CI_Exp < 1 – CI_Exp 2-3 | Syllable 1       | –0.64                     | 0.89             | 173       | –0.71           | .953            |
|             |                         | Syllable 2       | 0.46                      | 1.39             | 179       | 0.33            | .997            |
|             | CI_Exp < 1 – CI_Exp 3-4 | Syllable 1       | 1.08                      | 1.10             | 178       | 0.98            | .865            |
|             |                         | Syllable 2       | –1.58                     | 1.73             | 185       | –0.92           | .890            |
|             | CI_Exp 1-2 – CI_Exp 2-3 | Syllable 1       | –0.47                     | 0.67             | 176       | –0.71           | .955            |
|             |                         | Syllable 2       | 1.72                      | 1.05             | 183       | 1.64            | .473            |
|             | CI_Exp 1-2 – CI_Exp 3-4 | Syllable 1       | 1.24                      | 0.94             | 181       | 1.33            | .673            |
|             |                         | Syllable 2       | –0.33                     | 1.46             | 189       | –0.22           | .999            |
|             | CI_Exp 2-3 – CI_Exp 3-4 | Syllable 1       | 1.72                      | 0.96             | 183       | 1.79            | .381            |
|             |                         | Syllable 2       | –2.05                     | 1.50             | 191       | –1.37           | .650            |
| Triple-T3   | NH = 3 – CI_Exp < 1     | Syllable 1       | 3.24                      | 0.92             | 353       | 3.52            | < .01**         |
|             |                         | Syllable 2       | 0.89                      | 1.52             | 455       | 0.59            | .977            |
|             | NH = 3 – CI_Exp 1-2     | Syllable 1       | 3.84                      | 0.60             | 371       | 6.44            | < .001***       |
|             |                         | Syllable 2       | –0.48                     | 0.98             | 480       | –0.48           | .989            |
|             | NH = 3 – CI_Exp 2-3     | Syllable 1       | 3.12                      | 0.63             | 354       | 4.93            | < .001***       |
|             |                         | Syllable 2       | 0.79                      | 1.04             | 456       | 0.76            | .943            |
|             | NH = 3 – CI_Exp 3-4     | Syllable 1       | 5.44                      | 0.99             | 353       | 5.50            | < .001***       |
|             |                         | Syllable 2       | 1.17                      | 1.63             | 455       | 0.72            | .952            |
|             | CI_Exp < 1 – CI_Exp 1-2 | Syllable 1       | 0.60                      | 1.05             | 358       | 0.57            | .979            |
|             |                         | Syllable 2       | –1.37                     | 1.73             | 462       | –0.79           | .933            |
|             | CI_Exp < 1 – CI_Exp 2-3 | Syllable 1       | –0.12                     | 1.07             | 353       | –0.12           | 1.000           |
|             |                         | Syllable 2       | –0.10                     | 1.76             | 454       | –0.06           | 1.000           |
|             | CI_Exp < 1 – CI_Exp 3-4 | Syllable 1       | 2.20                      | 1.31             | 353       | 1.68            | .448            |
|             |                         | Syllable 2       | 0.28                      | 2.16             | 454       | 0.13            | 1.000           |

|                         |            |       |      |     |       |       |
|-------------------------|------------|-------|------|-----|-------|-------|
| CI_Exp 1-2 – CI_Exp 2-3 | Syllable 1 | –0.72 | 0.81 | 362 | –0.89 | .900  |
|                         | Syllable 2 | 1.26  | 1.33 | 467 | 0.95  | .878  |
| CI_Exp 1-2 – CI_Exp 3-4 | Syllable 1 | 1.60  | 1.11 | 358 | 1.45  | .597  |
|                         | Syllable 2 | 1.65  | 1.83 | 461 | 0.90  | .897  |
| CI_Exp 2-3 – CI_Exp 3-4 | Syllable 1 | 1.32  | 1.13 | 353 | 1.06  | .240  |
|                         | Syllable 2 | 0.38  | 1.86 | 454 | 0.21  | 1.000 |

*Note.* NH = normal hearing; CI = cochlear implant.
