# Supplementary material
Source: publisher figshare collection journal article supplement (https://asha.figshare.com/articles/dataset/_/8038889)
Supplement: Supplementary file 16 [file 1]

**Supplemental Material S11.** Pairwise comparison of lexical tone pitch range between groups (NH = 3, CI\_Exp < 1, CI\_Exp 1-2, CI\_Exp 2-3, and CI\_Exp 3-4).

| <b>Group difference</b> | <b><math>\beta</math></b> | <b>SE</b>   | <b>df</b>  | <b>t</b>    | <b>P</b>          |
|-------------------------|---------------------------|-------------|------------|-------------|-------------------|
| NH = 3 – CI_Exp < 1     | <b>3.57</b>               | <b>2.75</b> | <b>141</b> | <b>2.80</b> | <b>&lt; .05*</b>  |
| NH = 3 – CI_Exp 1-2     | <b>4.48</b>               | <b>1.69</b> | <b>141</b> | <b>3.65</b> | <b>&lt; .01**</b> |
| NH = 3 – CI_Exp 2-3     | <b>3.39</b>               | <b>1.95</b> | <b>141</b> | <b>2.73</b> | <b>&lt; .05*</b>  |
| NH = 3 – CI_Exp 3-4     | <b>3.01</b>               | <b>6.46</b> | <b>141</b> | <b>2.66</b> | <b>&lt; .05*</b>  |
| CI_Exp < 1 – CI_Exp 1-2 | 0.91                      | 3.04        | 141        | 0.30        | .998              |
| CI_Exp < 1 – CI_Exp 2-3 | -0.18                     | 3.20        | 141        | -0.06       | 1.000             |
| CI_Exp < 1 – CI_Exp 3-4 | -2.58                     | 6.94        | 141        | -0.66       | .964              |
| CI_Exp 1-2 – CI_Exp 2-3 | -1.09                     | 2.35        | 141        | -0.47       | .990              |
| CI_Exp 1-2 – CI_Exp 3-4 | -2.50                     | 6.59        | 141        | -0.83       | .920              |
| CI_Exp 2-3 – CI_Exp 3-4 | -2.40                     | 6.66        | 141        | -0.66       | .964              |

*Note.* NH = normal hearing; CI = cochlear implant.
