# Supplementary material
Source: publisher figshare collection journal article supplement (https://asha.figshare.com/articles/dataset/_/8038889)
Supplement: Supplementary file 17 [file 1]

**Supplemental Material S31.** Results of linear regression model of pitch slope of disyllabic tone sandhi compounds (Syllable 1) with different predictors. The predictors were entered into the model stepwise and the best model included all predictors.

| Predictor           | $\Delta R^2$ | <i>B</i> | <i>SE (B)</i> | $\beta$ | <i>p</i>  |
|---------------------|--------------|----------|---------------|---------|-----------|
| Context             | 0.17         | 0.172    | 0.015         | 0.129   | < .001*** |
| Age at implantation | 0.17         | 0.007    | 0.001         | 0.123   | < .001*** |
| CI experience       | 0.14         | 0.001    | 0.001         | 0.113   | < .001*** |
| Chronological age   | 0.06         | −0.003   | 0.001         | −0.065  | < .001*** |
| Residual hearing    | 0.03         | 0.007    | 0.001         | 0.018   | .204      |
