# Supplementary material
Source: publisher figshare collection journal article supplement (https://asha.figshare.com/articles/dataset/_/8038889)
Supplement: Supplementary file 18 [file 1]

**Supplemental Material S20.** Pairwise comparisons of neutral tone pitch slope between groups (NH = 3, CI\_Exp < 1, CI\_Exp 1-2, CI\_Exp 2-3, and CI\_Exp 3-4) across contexts (after T1/2/4 and after T3).

| Context      | Group difference                  | $\beta$     | SE          | df         | t           | p                   |
|--------------|-----------------------------------|-------------|-------------|------------|-------------|---------------------|
| After T1/2/4 | NH = 3 – CI_Exp < 1               | –0.89       | 0.80        | 207        | –1.10       | .806                |
|              | NH = 3 – CI_Exp 1-2               | –0.20       | 0.85        | 203        | –0.24       | .999                |
|              | NH = 3 – CI_Exp 2-3               | –0.18       | 2.09        | 221        | –0.09       | 1.000               |
|              | NH = 3 – CI_Exp 3-4               | –0.64       | 0.69        | 195        | –0.94       | .882                |
|              | CI_Exp < 1 – CI_Exp 1-2           | 0.68        | 0.71        | 223        | 0.96        | .873                |
|              | CI_Exp < 1 – CI_Exp 2-3           | 1.07        | 2.03        | 225        | 0.53        | .985                |
|              | CI_Exp < 1 – CI_Exp 3-4           | 0.24        | 0.50        | 226        | 0.48        | .989                |
|              | CI_Exp 1-2 – CI_Exp 2-3           | 0.39        | 2.05        | 224        | 0.19        | 1.000               |
|              | CI_Exp 1-2 – CI_Exp 3-4           | –0.44       | 0.57        | 213        | –0.77       | .940                |
|              | CI_Exp 2-3 – CI_Exp 3-4           | –0.82       | 1.99        | 224        | –0.41       | .994                |
| After T3     | <b>NH = 3 – CI_Exp &lt; 1</b>     | <b>2.13</b> | <b>1.08</b> | <b>647</b> | <b>2.05</b> | <b>&lt; .05*</b>    |
|              | <b>NH = 3 – CI_Exp 1-2</b>        | <b>2.69</b> | <b>1.12</b> | <b>616</b> | <b>2.40</b> | <b>&lt; .01**</b>   |
|              | <b>NH = 3 – CI_Exp 2-3</b>        | <b>2.27</b> | <b>2.80</b> | <b>658</b> | <b>2.19</b> | <b>&lt; .05*</b>    |
|              | <b>NH = 3 – CI_Exp 3-4</b>        | <b>4.18</b> | <b>0.91</b> | <b>601</b> | <b>4.58</b> | <b>&lt; .001***</b> |
|              | <b>CI_Exp &lt; 1 – CI_Exp 1-2</b> | <b>3.82</b> | <b>0.95</b> | <b>683</b> | <b>4.04</b> | <b>&lt; .001***</b> |
|              | CI_Exp < 1 – CI_Exp 2-3           | 1.40        | 2.73        | 669        | 1.25        | .725                |
|              | <b>CI_Exp &lt; 1 – CI_Exp 3-4</b> | <b>5.30</b> | <b>0.68</b> | <b>722</b> | <b>7.80</b> | <b>&lt; .001***</b> |
|              | CI_Exp 1-2 – CI_Exp 2-3           | 0.42        | 2.75        | 663        | 0.15        | 1.000               |
|              | CI_Exp 1-2 – CI_Exp 3-4           | <b>2.48</b> | <b>0.75</b> | <b>632</b> | <b>2.27</b> | <b>&lt; .05*</b>    |
|              | <b>CI_Exp 2-3 – CI_Exp 3-4</b>    | <b>1.90</b> | <b>2.67</b> | <b>664</b> | <b>0.71</b> | <b>.954</b>         |

*Note.* NH = normal hearing; CI = cochlear implant.
