# Supplementary material
Source: publisher figshare collection journal article supplement (https://asha.figshare.com/articles/dataset/_/8038889)
Supplement: Supplementary file 19 [file 1]

**Supplemental Material S35.** Results of linear mixed-effects model on pitch shape (slope and curvature) in children’s trisyllabic tone sandhi productions (Syllables 1 and 2), with two fixed factors “Group” (NH = 3, CI\_Exp < 1, CI\_Exp 1-2, CI\_Exp 2-3, and CI\_Exp 3-4) and “Context” (double-T3 and triple-T3) and a covariate “Chronological Age.”

| Syllable   | Parameter       | Factors                             | df 1     | df 2        | <i>F</i>    | <i>p</i>            |
|------------|-----------------|-------------------------------------|----------|-------------|-------------|---------------------|
| Syllable 1 | Pitch slope     | <b>Group</b>                        | <b>4</b> | <b>179</b>  | <b>3.70</b> | <b>&lt; .01**</b>   |
|            |                 | Context                             | 1        | 5803        | 0.37        | .544                |
|            |                 | Chronological Age                   | 1        | 185         | 2.98        | .086                |
|            |                 | <b>Group × Context</b>              | <b>4</b> | <b>5754</b> | <b>5.55</b> | <b>&lt; .001***</b> |
|            |                 | Group × Chronological Age           | 4        | 178         | 1.80        | .131                |
|            |                 | Context × Chronological Age         | 1        | 5794        | 0.34        | .558                |
|            |                 | Group × Context × Chronological Age | 4        | 5757        | 0.43        | .789                |
|            | Pitch curvature | Group                               | 4        | 2398        | 1.79        | .128                |
|            |                 | Context                             | 1        | 5692        | 0.04        | .836                |
|            |                 | Chronological Age                   | 1        | 2561        | 2.93        | .087                |
|            |                 | Group × Context                     | 4        | 5726        | 0.20        | .938                |
|            |                 | Group × Chronological Age           | 4        | 2388        | 1.97        | .096                |
|            |                 | Context × Chronological Age         | 1        | 5727        | 0.03        | .874                |
|            |                 | Group × Context × Chronological Age | 4        | 5727        | 0.18        | .950                |
| Syllable 2 | Pitch slope     | Group                               | 4        | 186         | 1.90        | .113                |
|            |                 | Context                             | 1        | 3139        | 0.44        | .509                |
|            |                 | Chronological Age                   | 1        | 193         | 1.00        | .317                |
|            |                 | <b>Group × Context</b>              | <b>4</b> | <b>5752</b> | <b>3.36</b> | <b>&lt; .01**</b>   |
|            |                 | Group × Chronological Age           | 4        | 185         | 1.12        | .351                |
|            |                 | Context × Chronological Age         | 1        | 5808        | 0.05        | .816                |
|            |                 | Group × Context × Chronological Age | 4        | 5757        | 0.34        | .854                |
|            | Pitch curvature | <b>Group</b>                        | <b>4</b> | <b>775</b>  | <b>2.99</b> | <b>&lt; .05*</b>    |
|            |                 | Context                             | 1        | 5351        | 0.99        | .319                |
|            |                 | Chronological Age                   | 1        | 846         | 2.79        | .095                |
|            |                 | Group × Context                     | 4        | 5721        | 0.30        | .881                |
|            |                 | Group × Chronological Age           | 4        | 771         | 1.90        | .109                |
|            |                 | Context × Chronological Age         | 1        | 5724        | 0.92        | .339                |
|            |                 | Group × Context × Chronological Age | 4        | 5721        | 0.22        | .929                |

*Note.* NH = normal hearing; CI = cochlear implant.
