# Supplementary material
Source: publisher figshare collection journal article supplement (https://asha.figshare.com/articles/dataset/_/8038889)
Supplement: Supplementary file 20 [file 1]

**Supplemental Material S16.** Results of linear mixed-effects model on normalized duration of neutral tone syllables, with three fixed factors “Group” (NH = 3, CI\_Imp 1-2, CI\_Imp 2-3, CI\_Imp 3-4, and CI\_Imp 4-5), “Context” (after T1/2/4 and after T3) and “Type” (Reduplicatives and Possessives) and a covariate “Chronological Age.”

| <b>Factors</b>                             | <b>df 1</b> | <b>df 2</b> | <b>F</b>     | <b>P</b>            |
|--------------------------------------------|-------------|-------------|--------------|---------------------|
| Group                                      | 4           | 206         | 1.72         | .148                |
| <b>Context</b>                             | <b>1</b>    | <b>1063</b> | <b>3.80</b>  | <b>&lt; .05*</b>    |
| <b>Type</b>                                | <b>1</b>    | <b>1080</b> | <b>7.93</b>  | <b>&lt; .01**</b>   |
| Chronological Age                          | 1           | 271         | 0.21         | .651                |
| Group × Context                            | 4           | 1049        | 1.45         | .215                |
| <b>Group × Type</b>                        | <b>4</b>    | <b>1046</b> | <b>8.864</b> | <b>&lt; .001***</b> |
| <b>Context × Type</b>                      | <b>1</b>    | <b>1063</b> | <b>9.43</b>  | <b>&lt; .01**</b>   |
| Group × Chronological Age                  | 4           | 208         | 1.35         | .253                |
| Context × Chronological Age                | 1           | 1071        | 0.99         | .321                |
| Type × Chronological Age                   | 1           | 1092        | 2.29         | .131                |
| Group × Context × Type                     | 4           | 1049        | 2.14         | .074                |
| Group × Context × Chronological Age        | 4           | 1050        | 1.17         | .320                |
| Group × Type × Chronological Age           | 4           | 1069        | 1.98         | .095                |
| Context × Type × Chronological Age         | 1           | 1071        | 1.69         | .194                |
| Group × Context × Type × Chronological Age | 4           | 1050        | 2.00         | .092                |

*Note.* NH = normal hearing; CI = cochlear implant.
