# Supplementary material
Source: publisher figshare collection journal article supplement (https://asha.figshare.com/articles/dataset/_/8038889)
Supplement: Supplementary file 21 [file 1]

**Supplemental Material S6.** Results of one-way analysis of variance (ANOVA) on pitch range in children's lexical tone productions, with an independent variable "Group" (NH = 3, CI\_Imp 1-2, CI\_Imp 2-3, CI\_Imp 3-4, and CI\_Imp 4-5) and a covariate "Chronological age."

| <b>Factor</b>             | <b>df</b> | <b>F</b>    | <b>p</b>         |
|---------------------------|-----------|-------------|------------------|
| <b>Group</b>              | <b>4</b>  | <b>3.22</b> | <b>&lt; .05*</b> |
| Chronological Age         | 1         | 2.80        | .096             |
| Group × Chronological Age | 4         | 0.01        | 1.000            |
| Residuals                 | 141       |             |                  |

*Note.* NH = normal hearing; CI = cochlear implant.
