# Supplementary material
Source: publisher figshare collection journal article supplement (https://asha.figshare.com/articles/dataset/_/8038889)
Supplement: Supplementary file 23 [file 1]

**Supplemental Material S21.** Results of linear mixed-effects model on normalized duration of neutral tone syllables, with three fixed factors “Group” (NH = 3, CI\_Exp < 1, CI\_Exp 1-2, CI\_Exp 2-3, and CI\_Exp 3-4), “Context” (after T1/2/4 and after T3) and “Type” (Reduplicatives and Possessives) and a covariate “Chronological Age.”

| <b>Factors</b>                             | <b>df 1</b> | <b>df 2</b> | <b>F</b>     | <b>p</b>          |
|--------------------------------------------|-------------|-------------|--------------|-------------------|
| <b>Group</b>                               | <b>4</b>    | <b>180</b>  | <b>4.539</b> | <b>&lt; .01**</b> |
| Context                                    | 1           | 1039        | 2.14         | .144              |
| <b>Type</b>                                | <b>1</b>    | <b>1060</b> | <b>4.77</b>  | <b>&lt; .05*</b>  |
| Chronological Age                          | 1           | 178         | 0.06         | .806              |
| Group × Context                            | 4           | 1039        | 1.14         | .337              |
| Group × Type                               | 4           | 1071        | 1.87         | .114              |
| <b>Context × Type</b>                      | <b>1</b>    | <b>1039</b> | <b>7.70</b>  | <b>&lt; .01**</b> |
| Group × Chronological Age                  | 4           | 179         | 0.48         | .751              |
| Context × Chronological Age                | 1           | 1039        | 2.54         | .111              |
| Type × Chronological Age                   | 1           | 1064        | 0.66         | .417              |
| Group × Context × Type                     | 4           | 1038        | 2.29         | .058              |
| Group × Context × Chronological Age        | 4           | 1038        | 0.77         | .545              |
| Group × Type × Chronological Age           | 4           | 1068        | 1.54         | .190              |
| Context × Type × Chronological Age         | 1           | 1039        | 1.64         | .201              |
| Group × Context × Type × Chronological Age | 4           | 1038        | 2.28         | .059              |

*Note.* NH = normal hearing; CI = cochlear implant.
