# Supplementary material
Source: publisher figshare collection journal article supplement (https://asha.figshare.com/articles/dataset/_/8038889)
Supplement: Supplementary file 24 [file 1]

**Supplemental Material S33.** Pairwise comparisons of pitch parameters of trisyllabic tone sandhi compounds (Syllables 1 and 2) between contexts (double-T3 vs. triple-T3) for each group (NH = 3, CI\_Imp 1-2, CI\_Imp 2-3, CI\_Imp 3-4, and CI\_Imp 4-5).

| Group      | Syllable   | Parameter | $\beta$      | $SE$        | $df$      | $t$          | $p$                 |
|------------|------------|-----------|--------------|-------------|-----------|--------------|---------------------|
| NH = 3     | Syllable 1 | Slope     | 0.81         | 0.18        | 5         | 1.89         | .059                |
|            | Syllable 2 | Slope     | <b>9.22</b>  | <b>0.71</b> | <b>5</b>  | <b>12.99</b> | <b>&lt; .001***</b> |
|            |            | Curvature | <b>-1.19</b> | <b>0.41</b> | <b>5</b>  | <b>-2.90</b> | <b>&lt; .05*</b>    |
| CI_Imp 1-2 | Syllable 1 | Slope     | 0.77         | 0.72        | 80        | 1.08         | .283                |
|            | Syllable 2 | Slope     | 1.58         | 1.46        | 80        | 1.09         | .281                |
|            |            | Curvature | <b>-4.28</b> | <b>1.33</b> | <b>80</b> | <b>-3.22</b> | <b>&lt; .001***</b> |
| CI_Imp 2-3 | Syllable 1 | Slope     | 0.16         | 0.44        | 19        | 0.38         | .706                |
|            | Syllable 2 | Slope     | -1.18        | 1.02        | 19        | -1.16        | .26                 |
|            |            | Curvature | 0.01         | 0.83        | 19        | 0.01         | .991                |
| CI_Imp 3-4 | Syllable 1 | Slope     | -0.35        | 0.52        | 30        | -0.68        | .498                |
|            | Syllable 2 | Slope     | -0.73        | 1.14        | 30        | -0.64        | .527                |
|            |            | Curvature | 0.13         | 0.98        | 30        | 0.13         | .893                |
| CI_Imp 4-5 | Syllable 1 | Slope     | -0.2         | 0.62        | 50        | -0.32        | .751                |
|            | Syllable 2 | Slope     | 0.52         | 1.29        | 50        | 0.4          | .688                |
|            |            | Curvature | 0.91         | 1.15        | 50        | 0.79         | .429                |

*Note.* NH = normal hearing; CI = cochlear implant.
