# Supplementary material
Source: publisher figshare collection journal article supplement (https://asha.figshare.com/articles/dataset/_/8038889)
Supplement: Supplementary file 25 [file 1]

**Supplemental Material S9.** Pairwise comparisons of lexical tone pitch contours (slope and curvature) between groups (NH = 3, CI\_Exp < 1, CI\_Exp 1-2, CI\_Exp 2-3, and CI\_Exp 3-4) for each tone.

| Tone                    | Group difference        | Parameter    | $\beta$     | SE          | df         | <i>t</i>    | <i>p</i>            |
|-------------------------|-------------------------|--------------|-------------|-------------|------------|-------------|---------------------|
| T1                      | NH = 3 – CI_Exp < 1     | Slope        | 0.12        | 1.37        | 612        | 0.09        | 1.000               |
|                         |                         | Curvature    | 0.66        | 1.28        | 841        | 0.52        | .986                |
|                         | NH = 3 – CI_Exp 1-2     | Slope        | -0.40       | 1.45        | 609        | -0.28       | .999                |
|                         |                         | Curvature    | 0.75        | 1.36        | 837        | 0.55        | .982                |
|                         | NH = 3 – CI_Exp 2-3     | Slope        | -1.73       | 3.21        | 586        | -0.54       | .983                |
|                         |                         | Curvature    | 0.74        | 3.01        | 808        | 0.24        | .999                |
|                         | NH = 3 – CI_Exp 3-4     | Slope        | -0.67       | 1.23        | 622        | -0.55       | .982                |
|                         |                         | Curvature    | 0.48        | 1.15        | 854        | 0.42        | .994                |
|                         | CI_Exp < 1 – CI_Exp 1-2 | Slope        | -0.52       | 1.08        | 580        | -0.48       | .989                |
|                         |                         | Curvature    | 0.09        | 1.02        | 801        | 0.09        | 1.000               |
|                         | CI_Exp < 1 – CI_Exp 2-3 | Slope        | -1.85       | 3.07        | 580        | -0.60       | .975                |
|                         |                         | Curvature    | 0.07        | 2.87        | 801        | 0.03        | 1.000               |
|                         | CI_Exp < 1 – CI_Exp 3-4 | Slope        | -0.79       | 0.76        | 584        | -1.04       | .838                |
|                         |                         | Curvature    | -0.18       | 0.72        | 806        | -0.26       | .999                |
|                         | CI_Exp 1-2 – CI_Exp 2-3 | Slope        | -1.33       | 3.10        | 580        | -0.43       | .993                |
|                         |                         | Curvature    | -0.02       | 2.91        | 801        | -0.01       | 1.000               |
|                         | CI_Exp 1-2 – CI_Exp 3-4 | Slope        | -0.28       | 0.90        | 583        | -0.31       | .998                |
|                         |                         | Curvature    | -0.27       | 0.84        | 804        | -0.32       | .998                |
| CI_Exp 2-3 – CI_Exp 3-4 | Slope                   | 1.05         | 3.01        | 580         | 0.35       | .997        |                     |
|                         | Curvature               | -0.26        | 2.82        | 801         | -0.09      | 1.000       |                     |
| T2                      | NH = 3 – CI_Exp < 1     | <b>Slope</b> | <b>2.61</b> | <b>1.26</b> | <b>801</b> | <b>2.07</b> | <b>&lt; .05*</b>    |
|                         |                         | Curvature    | 0.52        | 1.34        | 580        | 0.39        | .995                |
|                         | NH = 3 – CI_Exp 1-2     | <b>Slope</b> | <b>2.94</b> | <b>1.33</b> | <b>801</b> | <b>2.20</b> | <b>&lt; .05*</b>    |
|                         |                         | Curvature    | 2.54        | 1.42        | 580        | 1.78        | .387                |
|                         | NH = 3 – CI_Exp 2-3     | <b>Slope</b> | <b>2.85</b> | <b>3.00</b> | <b>801</b> | <b>2.62</b> | <b>&lt; .01**</b>   |
|                         |                         | Curvature    | 0.12        | 3.20        | 580        | 0.04        | 1.000               |
|                         | NH = 3 – CI_Exp 3-4     | <b>Slope</b> | <b>3.48</b> | <b>1.20</b> | <b>581</b> | <b>2.90</b> | <b>&lt; .01**</b>   |
|                         |                         | Curvature    | 2.13        | 1.12        | 802        | 1.90        | .318                |
|                         | CI_Exp < 1 – CI_Exp 1-2 | Slope        | 2.01        | 1.08        | 580        | 1.86        | .342                |
|                         |                         | Curvature    | 0.33        | 1.02        | 801        | 0.32        | .998                |
|                         | CI_Exp < 1 – CI_Exp 2-3 | Slope        | 0.41        | 3.07        | 580        | 0.13        | 1.000               |
|                         |                         | Curvature    | 4.46        | 2.87        | 801        | 1.55        | .528                |
|                         | CI_Exp < 1 – CI_Exp 3-4 | <b>Slope</b> | <b>2.96</b> | <b>0.76</b> | <b>583</b> | <b>3.87</b> | <b>&lt; .001***</b> |
|                         |                         | Curvature    | 0.47        | 0.72        | 804        | 0.66        | .964                |
|                         | CI_Exp 1-2 – CI_Exp 2-3 | Slope        | 2.42        | 3.10        | 580        | 0.78        | .937                |

|                         |                  |              |             |            |              |                     |
|-------------------------|------------------|--------------|-------------|------------|--------------|---------------------|
|                         | Curvature        | 4.79         | 2.91        | 801        | 1.65         | .467                |
| CI_Exp 1-2 – CI_Exp 3-4 | Slope            | 0.94         | 0.90        | 582        | 1.05         | .830                |
|                         | Curvature        | 0.80         | 0.84        | 803        | 0.96         | .874                |
| CI_Exp 2-3 – CI_Exp 3-4 | Slope            | 3.36         | 3.01        | 580        | 1.12         | .797                |
|                         | Curvature        | 3.99         | 2.82        | 801        | 1.42         | .618                |
| NH = 3 – CI_Exp < 1     | <b>Slope</b>     | <b>1.94</b>  | <b>1.34</b> | <b>580</b> | <b>1.84</b>  | <b>&lt; .05*</b>    |
|                         | Curvature        | 1.05         | 1.26        | 801        | 0.83         | .921                |
| NH = 3 – CI_Exp 1-2     | Slope            | -0.73        | 1.42        | 580        | -0.52        | .986                |
|                         | <b>Curvature</b> | <b>6.08</b>  | <b>1.33</b> | <b>801</b> | <b>2.81</b>  | <b>&lt; .01**</b>   |
| NH = 3 – CI_Exp 2-3     | Slope            | 2.28         | 3.20        | 580        | 0.71         | .954                |
|                         | <b>Curvature</b> | <b>8.27</b>  | <b>3.00</b> | <b>801</b> | <b>2.75</b>  | <b>&lt; .05*</b>    |
| NH = 3 – CI_Exp 3-4     | Slope            | 0.73         | 1.20        | 584        | 0.61         | .974                |
|                         | <b>Curvature</b> | <b>5.37</b>  | <b>1.13</b> | <b>806</b> | <b>4.77</b>  | <b>&lt; .001***</b> |
| CI_Exp < 1 – CI_Exp 1-2 | <b>Slope</b>     | <b>-2.67</b> | <b>1.08</b> | <b>580</b> | <b>-2.47</b> | <b>&lt; .05*</b>    |
|                         | Curvature        | -2.13        | 1.02        | 801        | -2.10        | .222                |
| CI_Exp < 1 – CI_Exp 2-3 | Slope            | 0.34         | 3.07        | 580        | 0.11         | 1.000               |
|                         | <b>Curvature</b> | <b>-9.31</b> | <b>2.87</b> | <b>801</b> | <b>-3.24</b> | <b>&lt; .01**</b>   |
| CI_Exp < 1 – CI_Exp 3-4 | Slope            | -1.21        | 0.77        | 590        | -1.58        | .514                |
|                         | <b>Curvature</b> | <b>-6.41</b> | <b>0.72</b> | <b>813</b> | <b>-8.93</b> | <b>&lt; .001***</b> |
| CI_Exp 1-2 – CI_Exp 2-3 | Slope            | 3.01         | 3.10        | 580        | 0.97         | .868                |
|                         | <b>Curvature</b> | <b>-7.18</b> | <b>2.91</b> | <b>801</b> | <b>-2.47</b> | <b>&lt; .05*</b>    |
| CI_Exp 1-2 – CI_Exp 3-4 | Slope            | 1.46         | 0.90        | 587        | 1.63         | .481                |
|                         | <b>Curvature</b> | <b>-4.29</b> | <b>0.84</b> | <b>810</b> | <b>-5.08</b> | <b>&lt; .001***</b> |
| CI_Exp 2-3 – CI_Exp 3-4 | Slope            | -1.55        | 3.01        | 581        | -0.52        | .986                |
|                         | Curvature        | 2.90         | 2.82        | 801        | 1.03         | .842                |
| NH = 3 – CI_Exp < 1     | <b>Slope</b>     | <b>-2.70</b> | <b>1.34</b> | <b>580</b> | <b>-1.82</b> | <b>&lt; .05*</b>    |
|                         | Curvature        | 0.26         | 1.26        | 801        | 0.21         | 1.000               |
| NH = 3 – CI_Exp 1-2     | <b>Slope</b>     | <b>-3.27</b> | <b>1.42</b> | <b>580</b> | <b>-2.19</b> | <b>&lt; .05*</b>    |
|                         | Curvature        | -0.45        | 1.33        | 801        | -0.34        | .997                |
| NH = 3 – CI_Exp 2-3     | <b>Slope</b>     | <b>-4.50</b> | <b>3.20</b> | <b>580</b> | <b>-2.03</b> | <b>&lt; .05*</b>    |
|                         | Curvature        | 3.60         | 3.00        | 801        | 1.20         | .751                |
| NH = 3 – CI_Exp 3-4     | <b>Slope</b>     | <b>-2.66</b> | <b>1.20</b> | <b>581</b> | <b>-2.22</b> | <b>&lt; .05*</b>    |
|                         | Curvature        | 1.90         | 1.12        | 801        | 1.70         | .438                |
| CI_Exp < 1 – CI_Exp 1-2 | Slope            | -0.96        | 1.08        | 580        | -0.89        | .901                |
|                         | Curvature        | 0.18         | 1.02        | 801        | 0.18         | 1.000               |
| CI_Exp < 1 – CI_Exp 2-3 | <b>Slope</b>     | <b>2.20</b>  | <b>3.07</b> | <b>580</b> | <b>2.35</b>  | <b>&lt; .05*</b>    |

T3

T4

|                                   |              |             |             |            |             |                     |
|-----------------------------------|--------------|-------------|-------------|------------|-------------|---------------------|
|                                   | Curvature    | 3.34        | 2.87        | 801        | 1.16        | .773                |
| <b>CI_Exp &lt; 1 – CI_Exp 3-4</b> | <b>Slope</b> | <b>3.36</b> | <b>0.76</b> | <b>582</b> | <b>4.40</b> | <b>&lt; .001***</b> |
|                                   | Curvature    | 1.64        | 0.71        | 803        | 2.29        | .148                |
| <b>CI_Exp 1-2 – CI_Exp 2-3</b>    | <b>Slope</b> | <b>2.24</b> | <b>3.10</b> | <b>580</b> | <b>2.01</b> | <b>&lt; .05*</b>    |
|                                   | Curvature    | 3.16        | 2.91        | 801        | 1.09        | .814                |
| <b>CI_Exp 1-2 – CI_Exp 3-4</b>    | <b>Slope</b> | <b>2.39</b> | <b>0.90</b> | <b>581</b> | <b>2.67</b> | <b>&lt; .05*</b>    |
|                                   | Curvature    | 1.46        | 0.84        | 802        | 1.73        | .414                |
| CI_Exp 2-3 – CI_Exp 3-4           | Slope        | -3.84       | 3.01        | 580        | -1.28       | .704                |
|                                   | Curvature    | -1.70       | 2.82        | 801        | -0.60       | .975                |

*Note.* NH = normal hearing; CI = cochlear implant.
