# Supplementary material
Source: publisher figshare collection journal article supplement (https://asha.figshare.com/articles/dataset/_/8038889)
Supplement: Supplementary file 26 [file 1]

**Supplemental Material S29.** Pairwise comparisons of pitch slope of disyllabic tone sandhi compounds (Syllable 1) between two sandhi contexts (full sandhi vs. half sandhi) for each group (NH = 3, CI\_Exp < 1, CI\_Exp 1-2, CI\_Exp 2-3, and CI\_Exp 3-4).

| Group      | $\beta$ | <i>SE</i> | df  | <i>t</i> | <i>p</i>  |
|------------|---------|-----------|-----|----------|-----------|
| NH = 3     | 12.12   | 0.50      | 20  | 24.43    | < .001*** |
| CI_Exp < 1 | 0.71    | 0.80      | 131 | 0.89     | .377      |
| CI_Exp 1-2 | 1.36    | 0.66      | 61  | 1.05     | .149      |
| CI_Exp 2-3 | 1.99    | 0.75      | 100 | 1.33     | .093      |
| CI_Exp 3-4 | 0.65    | 2.07      | 226 | 0.32     | .751      |

*Note.* NH = normal hearing; CI = cochlear implant.
