# Supplementary material
Source: publisher figshare collection journal article supplement (https://asha.figshare.com/articles/dataset/_/8038889)
Supplement: Supplementary file 27 [file 1]

**Supplemental Material S26.** Pairwise comparisons of pitch slope of disyllabic tone sandhi compounds (Syllable 1) between two sandhi contexts (full sandhi vs. half sandhi) for each group (NH = 3, CI\_Imp 1-2, CI\_Imp 2-3, CI\_Imp 3-4, and CI\_Imp 4-5).

| Group      | $\beta$ | SE   | df  | $t$   | $p$       |
|------------|---------|------|-----|-------|-----------|
| NH = 3     | 12.12   | 0.50 | 20  | 24.43 | < .001*** |
| CI_Imp 1-2 | 3.63    | 0.88 | 185 | 4.14  | < .001*** |
| CI_Imp 2-3 | 1.37    | 0.60 | 42  | 1.27  | .106      |
| CI_Imp 3-4 | 0.99    | 0.66 | 61  | 1.01  | .141      |
| CI_Imp 4-5 | 0.46    | 0.76 | 104 | 0.60  | .55       |

*Note.* NH = normal hearing; CI = cochlear implant.
