# Supplementary material
Source: publisher figshare collection journal article supplement (https://asha.figshare.com/articles/dataset/_/8038889)
Supplement: Supplementary file 28 [file 1]

**Supplemental Material S13.** Results of linear mixed-effects model on pitch shape (slope and curvature) in children’s neutral tone productions, with three fixed factors “Group” (NH = 3, CI\_Imp 1-2, CI\_Imp 2-3, CI\_Imp 3-4, and CI\_Imp 4-5), “Context” (after T1/2/4 and after T3), and “Type” (Reduplicatives and Possessives) and a covariate “Chronological Age.”

| Parameter                                  | Factors                             | df 1     | df 2         | F           | p                  |
|--------------------------------------------|-------------------------------------|----------|--------------|-------------|--------------------|
| Pitch slope                                | Group                               | 4        | 232          | 1.46        | .215               |
|                                            | <b>Context</b>                      | <b>1</b> | <b>12050</b> | <b>4.66</b> | <b>&lt; .01*</b>   |
|                                            | Type                                | 1        | 11862        | 2.99        | .084               |
|                                            | Chronological age                   | 1        | 312          | 0.65        | .421               |
|                                            | Group × Context                     | 4        | 11950        | 0.52        | .719               |
|                                            | Group × Type                        | 4        | 11746        | 1.47        | .210               |
|                                            | <b>Context × Type</b>               | <b>1</b> | <b>12050</b> | <b>3.39</b> | <b>&lt; .05*</b>   |
|                                            | Group × Chronological Age           | 4        | 232          | 1.20        | .310               |
|                                            | Context × Chronological Age         | 1        | 12010        | 0.10        | .750               |
|                                            | Type × Chronological Age            | 1        | 11605        | 0.85        | .357               |
|                                            | <b>Group × Context × Type</b>       | <b>4</b> | <b>11977</b> | <b>3.09</b> | <b>&lt; .01***</b> |
|                                            | Group × Context × Chronological Age | 4        | 11939        | 0.27        | .900               |
|                                            | Group × Type × Chronological Age    | 4        | 11710        | 1.84        | .117               |
|                                            | Context × Type × Chronological Age  | 1        | 12009        | 0.19        | .659               |
| Group × Context × Type × Chronological Age | 4                                   | 11938    | 2.19         | .067        |                    |
| Pitch curvature                            | Group                               | 4        | 381          | 0.92        | .450               |
|                                            | Context                             | 1        | 11964        | 2.19        | .139               |
|                                            | Type                                | 1        | 11848        | 0.07        | .793               |
|                                            | Chronological Age                   | 1        | 568          | 0.03        | .870               |
|                                            | Group × Context                     | 4        | 11937        | 0.08        | .988               |
|                                            | Group × Type                        | 4        | 11792        | 0.40        | .810               |
|                                            | Context × Type                      | 1        | 11964        | 0.00        | .994               |
|                                            | Group × Chronological Age           | 4        | 388          | 0.38        | .820               |
|                                            | Context × Chronological Age         | 1        | 11943        | 0.00        | .981               |
|                                            | Type × Chronological Age            | 1        | 11709        | 0.10        | .749               |
|                                            | Group × Context × Type              | 4        | 11937        | 0.12        | .974               |
|                                            | Group × Context × Chronological Age | 4        | 11931        | 0.26        | .901               |
|                                            | Group × Type × Chronological Age    | 4        | 11775        | 0.39        | .818               |
|                                            | Context × Type × Chronological Age  | 1        | 11943        | 0.06        | .803               |
| Group × Context × Type × Chronological Age | 4                                   | 11931    | 0.14         | .967        |                    |

*Note.* NH = normal hearing; CI = cochlear implant.
