# Supplementary material
Source: publisher figshare collection journal article supplement (https://asha.figshare.com/articles/dataset/_/8038889)
Supplement: Supplementary file 29 [file 1]

**Supplemental Material S1.** Participant demographic information.

| Participant number | Gender | Residual hearing (L/R in dB) | Type of device(s) | CI brand         | Age at implantation (month) | CI experience (month) | Age (months) | Age at using hearing aids (month) | Hearing aid experience before CI surgery (month) |
|--------------------|--------|------------------------------|-------------------|------------------|-----------------------------|-----------------------|--------------|-----------------------------------|--------------------------------------------------|
| 1                  | M      | 95/95                        | CI+HA             | MEDEL            | 13                          | 29                    | 42           |                                   |                                                  |
| 2                  | M      | 110/120                      | CI+HA             | MEDEL            | 15                          | 35                    | 50           |                                   |                                                  |
| 3                  | M      | 100/100                      | CI+HA             | MEDEL            | 18                          | 39                    | 58           |                                   |                                                  |
| 4                  | M      | 110/110                      | CI+HA             | Cochlear         | 18                          | 48                    | 67           |                                   |                                                  |
| 5                  | M      | 110/110                      | CI+HA             | Advanced Bionics | 18                          | 31                    | 50           | 17                                | 1                                                |
| 6                  | M      | 80/100                       | CI+HA             | MEDEL            | 22                          | 33                    | 55           |                                   |                                                  |
| 7                  | M      | 100/110                      | CI+HA             | Cochlear         | 23                          | 28                    | 51           |                                   |                                                  |
| 8                  | F      | 90/90                        | CI+HA             | MEDEL            | 25                          | 13                    | 39           |                                   |                                                  |
| 9                  | M      | 110/110                      | CI+HA             | Cochlear         | 25                          | 25                    | 50           | 18                                | 7                                                |
| 10                 | M      | 97/97                        | CI+HA             | MEDEL            | 26                          | 10                    | 37           |                                   |                                                  |
| 11                 | F      | 100/100                      | CI+HA             | MEDEL            | 27                          | 49                    | 76           |                                   |                                                  |
| 12                 | M      | 110/110                      | CI+HA             | Cochlear         | 27                          | 20                    | 47           |                                   |                                                  |
| 13                 | F      | 90/100                       | CI+HA             | MEDEL            | 27                          | 28                    | 55           |                                   |                                                  |
| 14                 | M      | 100/110                      | CI+HA             | Cochlear         | 28                          | 42                    | 70           |                                   |                                                  |
| 15                 | M      | 100/85                       | CI+HA             | MEDEL            | 28                          | 22                    | 50           | 28                                | 0                                                |
| 16                 | M      | 80/90                        | CI+HA             | Advanced Bionics | 29                          | 42                    | 71           |                                   |                                                  |
| 17                 | F      | 100/110                      | CI+HA             | Advanced Bionics | 29                          | 43                    | 73           |                                   |                                                  |
| 18                 | M      | 100/100                      | CI+HA             | MEDEL            | 29                          | 21                    | 50           |                                   |                                                  |
| 19                 | F      | 95/95                        | CI+CI             | Advanced Bionics | 29                          | 17                    | 47           |                                   |                                                  |
| 20                 | M      | 97/97                        | CI+HA             | MEDEL            | 30                          | 14                    | 45           |                                   |                                                  |
| 21                 | M      | 100/100                      | CI+CI             | Mindni           | 30                          | 7                     | 37           |                                   |                                                  |
| 22                 | F      | 110/110                      | CI+HA             | MEDEL            | 30                          | 18                    | 48           |                                   |                                                  |
| 23                 | M      | 105/95                       | CI+HA             | MEDEL            | 30                          | 22                    | 52           |                                   |                                                  |
| 24                 | M      | 110/110                      | CI+HA             | Cochlear         | 30                          | 22                    | 52           |                                   |                                                  |
| 25                 | F      | 95/95                        | CI+CI             | MEDEL            | 30                          | 34                    | 64           |                                   |                                                  |
| 26                 | F      | 110/100                      | CI+HA             | Cochlear         | 30                          | 28                    | 59           | 30                                | 0                                                |
| 27                 | F      | 106/80                       | CI+HA             | MEDEL            | 31                          | 29                    | 60           |                                   |                                                  |
| 28                 | F      | 96/96                        | CI+HA             | MEDEL            | 31                          | 16                    | 48           |                                   |                                                  |
| 29                 | M      | 100/70                       | CI+HA             | Cochlear         | 31                          | 25                    | 57           |                                   |                                                  |
| 30                 | M      | 110/110                      | CI+HA             | MEDEL            | 32                          | 14                    | 47           |                                   |                                                  |
| 31                 | M      | 97/97                        | CI+HA             | MEDEL            | 32                          | 26                    | 58           |                                   |                                                  |
| 32                 | M      | 97/97                        | CI+HA             | MEDEL            | 33                          | 11                    | 44           |                                   |                                                  |
| 33                 | M      | 97/97                        | CI+CI             | Cochlear         | 33                          | 18                    | 52           |                                   |                                                  |
| 34                 | M      | 115/115                      | CI+HA             | MEDEL            | 33                          | 26                    | 59           | 33                                | 0                                                |
| 35                 | M      | 100/100                      | CI+HA             | Cochlear         | 34                          | 18                    | 53           |                                   |                                                  |
| 36                 | F      | 97/97                        | CI+HA             | MEDEL            | 34                          | 10                    | 45           |                                   |                                                  |
| 37                 | F      | 110/100                      | CI+HA             | Cochlear         | 34                          | 20                    | 54           | 34                                | 0                                                |

|    |   |         |       |                     |    |    |    |    |    |
|----|---|---------|-------|---------------------|----|----|----|----|----|
| 38 | M | 100/105 | CI+HA | MEDEL               | 35 | 35 | 70 |    |    |
| 39 | F | 95/100  | CI+HA | MEDEL               | 36 | 22 | 58 |    |    |
| 40 | M | 98/110  | CI+HA | MEDEL               | 36 | 22 | 59 |    |    |
| 41 | F | 97/97   | CI+HA | MEDEL               | 37 | 9  | 46 |    |    |
| 42 | M | 100/100 | CI+HA | MEDEL               | 37 | 24 | 62 | 37 | 0  |
| 43 | M | 110/110 | CI+HA | MEDEL               | 37 | 28 | 66 | 18 | 19 |
| 44 | F | 100/100 | CI+HA | Cochlear            | 38 | 9  | 47 |    |    |
| 45 | M | 100/100 | CI+HA | MEDEL               | 38 | 23 | 61 |    |    |
| 46 | M | 110/110 | CI+HA | Cochlear            | 38 | 28 | 66 |    |    |
| 47 | F | 100/100 | CI+HA | MEDEL               | 39 | 19 | 59 | 31 | 8  |
| 48 | F | 100/100 | CI+HA | MEDEL               | 40 | 11 | 52 |    |    |
| 49 | M | 80/90   | CI+HA | Cochlear            | 40 | 29 | 70 |    |    |
| 50 | F | 100/90  | CI+HA | Cochlear            | 40 | 16 | 56 |    |    |
| 51 | M | 110/110 | CI+HA | Cochlear            | 41 | 20 | 62 |    |    |
| 52 | F | 80/110  | CI+HA | MEDEL               | 41 | 25 | 67 | 24 | 17 |
| 53 | F | 100/100 | CI+CI | MEDEL               | 42 | 20 | 63 |    |    |
| 54 | M | 60/90   | CI+HA | Cochlear            | 43 | 11 | 55 |    |    |
| 55 | M | 90/90   | CI+HA | Cochlear            | 43 | 16 | 59 |    |    |
| 56 | F | 96/96   | CI+HA | MEDEL               | 44 | 6  | 50 |    |    |
| 57 | F | 100/100 | CI+CI | Cochlear            | 45 | 20 | 66 |    |    |
| 58 | M | 100/110 | CI+HA | Cochlear            | 47 | 29 | 76 |    |    |
| 59 | M | 95/95   | CI+HA | Cochlear            | 47 | 13 | 60 | 29 | 18 |
| 60 | F | 96/96   | CI+HA | Cochlear            | 48 | 20 | 69 |    |    |
| 61 | F | 90/110  | CI+HA | MEDEL               | 49 | 7  | 56 | 40 | 9  |
| 62 | F | 100/90  | CI+HA | MEDEL               | 52 | 14 | 66 |    |    |
| 63 | F | 100/100 | CI+HA | MEDEL               | 53 | 22 | 76 |    |    |
| 64 | M | 100/100 | CI+HA | MEDEL               | 53 | 22 | 76 |    |    |
| 65 | M | 100/105 | CI+HA | MEDEL               | 54 | 21 | 76 |    |    |
| 66 | F | 110/110 | CI+HA | Cochlear            | 54 | 2  | 56 |    |    |
| 67 | M | 90/110  | CI+HA | Cochlear            | 55 | 16 | 71 |    |    |
| 68 | F | 110/110 | CI+CI | Advanced<br>Bionics | 55 | 11 | 66 |    |    |
| 69 | F | 100/100 | CI+HA | Cochlear            | 55 | 10 | 65 |    |    |
| 70 | F | 80/90   | CI+HA | Cochlear            | 58 | 10 | 68 |    |    |
| 71 | M | 80/90   | CI+HA | Cochlear            | 61 | 7  | 68 |    |    |
| 72 | M | 80/90   | CI+HA | Cochlear            | 74 | 6  | 80 |    |    |

*Note.* M = male; F = female; L = left; R = right; CI = cochlear implant; HA = hearing aid.
