# Supplementary material
Source: publisher figshare collection journal article supplement (https://asha.figshare.com/articles/dataset/_/8038889)
Supplement: Supplementary file 30 [file 1]

**Supplemental Material S30.** Pairwise comparisons of pitch slope of disyllabic tone sandhi compounds (syllable 2) between groups (NH = 3, CI\_Exp < 1, CI\_Exp 1-2, CI\_Exp 2-3, and CI\_Exp 3-4) for each sandhi context (full sandhi and half sandhi).

| Context     | Group difference        | $\beta$      | SE          | df         | <i>t</i>      | <i>p</i>            |
|-------------|-------------------------|--------------|-------------|------------|---------------|---------------------|
| Full sandhi | NH = 3 – CI_Exp < 1     | <b>3.75</b>  | <b>1.07</b> | <b>193</b> | <b>3.50</b>   | <b>&lt; .01**</b>   |
|             | NH = 3 – CI_Exp 1-2     | <b>4.36</b>  | <b>0.76</b> | <b>190</b> | <b>5.72</b>   | <b>&lt; .001***</b> |
|             | NH = 3 – CI_Exp 2-3     | <b>3.12</b>  | <b>0.82</b> | <b>195</b> | <b>3.80</b>   | <b>&lt; .01**</b>   |
|             | NH = 3 – CI_Exp 3-4     | <b>4.64</b>  | <b>1.14</b> | <b>200</b> | <b>4.08</b>   | <b>&lt; .001***</b> |
|             | CI_Exp < 1 – CI_Exp 1-2 | 0.61         | 1.17        | 197        | 0.52          | .985                |
|             | CI_Exp < 1 – CI_Exp 2-3 | –0.63        | 1.21        | 199        | –0.52         | .985                |
|             | CI_Exp < 1 – CI_Exp 3-4 | 0.89         | 1.44        | 201        | 0.62          | .972                |
|             | CI_Exp 1-2 – CI_Exp 2-3 | –1.24        | 0.94        | 201        | –1.32         | .682                |
|             | CI_Exp 1-2 – CI_Exp 3-4 | 0.28         | 1.23        | 203        | 0.23          | .999                |
|             | CI_Exp 2-3 – CI_Exp 3-4 | 1.52         | 1.26        | 204        | 1.20          | .751                |
| Half sandhi | NH = 3 – CI_Exp < 1     | <b>–7.67</b> | <b>0.91</b> | <b>102</b> | <b>–8.39</b>  | <b>&lt; .001***</b> |
|             | NH = 3 – CI_Exp 1-2     | <b>–6.68</b> | <b>0.65</b> | <b>102</b> | <b>–10.22</b> | <b>&lt; .001***</b> |
|             | NH = 3 – CI_Exp 2-3     | <b>–6.30</b> | <b>0.70</b> | <b>102</b> | <b>–9.01</b>  | <b>&lt; .001***</b> |
|             | NH = 3 – CI_Exp 3-4     | <b>–7.51</b> | <b>0.96</b> | <b>102</b> | <b>–7.81</b>  | <b>&lt; .001***</b> |
|             | CI_Exp < 1 – CI_Exp 1-2 | 1.00         | 0.99        | 102        | 1.01          | .852                |
|             | CI_Exp < 1 – CI_Exp 2-3 | 1.37         | 1.02        | 102        | 1.35          | .664                |
|             | CI_Exp < 1 – CI_Exp 3-4 | 0.16         | 1.22        | 102        | 0.13          | 1.000               |
|             | CI_Exp 1-2 – CI_Exp 2-3 | 0.38         | 0.80        | 103        | 0.48          | .990                |
|             | CI_Exp 1-2 – CI_Exp 3-4 | –0.83        | 1.03        | 103        | –0.81         | .928                |
|             | CI_Exp 2-3 – CI_Exp 3-4 | –1.21        | 1.06        | 103        | –1.14         | .785                |

Note. NH = normal hearing; CI = cochlear implant.
