# Supplementary material
Source: publisher figshare collection journal article supplement (https://asha.figshare.com/articles/dataset/_/8038889)
Supplement: Supplementary file 31 [file 1]

**Supplemental Material S38.** Results of linear regression models of pitch slope of trisyllabic tone sandhi compounds (Syllables 1 and 2) with different predictors (Context: double-T3 context T3T3T1/2/4 and triple-T3 context T3T3T3). The predictors were entered into the model stepwise and the best model included all predictors.

| Predictor           | Syllable | $\Delta R^2$ | <i>B</i> | <i>SE (B)</i> | $\beta$ | <i>p</i>  |
|---------------------|----------|--------------|----------|---------------|---------|-----------|
| Context             | 1        | 0.03         | −0.008   | 0.017         | −0.011  | .612      |
|                     | 2        | 0.19         | 0.047    | 0.025         | 0.053   | < .05*    |
| Age at implantation | 1        | 0.17         | 0.004    | 0.001         | −0.301  | < .001*** |
|                     | 2        | 0.06         | 0.003    | 0.002         | −0.081  | < .001*** |
| CI experience       | 1        | 0.13         | 0.001    | 0.001         | −0.140  | < .001*** |
|                     | 2        | 0.06         | −0.005   | 0.002         | 0.051   | < .05*    |
| Chronological age   | 1        | 0.07         | −0.009   | 0.001         | 0.123   | < .001*** |
|                     | 2        | 0.01         | 0.001    | 0.001         | −0.012  | .090      |
| Residual hearing    | 1        | 0.03         | −0.004   | 0.001         | 0.012   | .820      |
|                     | 2        | 0.01         | −0.001   | 0.001         | −0.011  | .789      |
