# Supplementary material
Source: publisher figshare collection journal article supplement (https://asha.figshare.com/articles/dataset/_/8038889)
Supplement: Supplementary file 32 [file 1]

**Supplemental Material S14.** Pairwise comparisons of neutral tone pitch slope between contexts (after T1/2/4 vs. after T3) across types (Reduplicative and Possessive) and groups (NH = 3, CI\_Imp 1-2, CI\_Imp 2-3, CI\_Imp 3-4, and CI\_Imp 4-5).

| <b>Group</b>      | <b>Type</b>          | <b><math>\beta</math></b> | <b><i>SE</i></b> | <b><i>df</i></b> | <b><i>t</i></b> | <b><i>p</i></b>   |
|-------------------|----------------------|---------------------------|------------------|------------------|-----------------|-------------------|
| <b>NH = 3</b>     | <b>Reduplicative</b> | <b>-9.79</b>              | <b>2.65</b>      | <b>4</b>         | <b>-3.70</b>    | <b>&lt; .01**</b> |
|                   | <b>Possessive</b>    | <b>-11.49</b>             | <b>2.65</b>      | <b>4</b>         | <b>-4.34</b>    | <b>&lt; .01**</b> |
| <b>CI_Imp 1-2</b> | <b>Reduplicative</b> | <b>-6.86</b>              | <b>3.42</b>      | <b>11</b>        | <b>-2.01</b>    | <b>&lt; .05*</b>  |
|                   | Possessive           | -2.29                     | 3.68             | 15               | -0.62           | .543              |
| <b>CI_Imp 2-3</b> | Reduplicative        | -1.16                     | 2.76             | 5                | -0.42           | .693              |
|                   | Possessive           | -1.38                     | 2.80             | 5                | -0.49           | .642              |
| <b>CI_Imp 3-4</b> | Reduplicative        | -1.99                     | 2.97             | 6                | -0.67           | .527              |
|                   | Possessive           | -0.59                     | 2.99             | 7                | -0.20           | .850              |
| <b>CI_Imp 4-5</b> | Reduplicative        | -2.18                     | 3.98             | 21               | -0.55           | .589              |
|                   | Possessive           | -2.41                     | 3.97             | 21               | -0.61           | .551              |

*Note.* NH = normal hearing; CI = cochlear implant.
