# Supplementary material
Source: publisher figshare collection journal article supplement (https://asha.figshare.com/articles/dataset/_/8038889)
Supplement: Supplementary file 33 [file 1]

**Supplemental Material S36.** Pairwise comparisons of pitch slope of trisyllabic tone sandhi compounds (Syllables 1 and 2) between contexts (double-T3 vs. triple-T3) for each group (NH = 3, CI\_Exp < 1, CI\_Exp 1-2, CI\_Exp 2-3, and CI\_Exp 3-4).

| Group      | Syllable   | $\beta$     | SE          | df       | <i>t</i>     | <i>p</i>            |
|------------|------------|-------------|-------------|----------|--------------|---------------------|
| NH = 3     | Syllable 1 | 0.81        | 0.18        | 5        | 1.89         | .059                |
|            | Syllable 2 | <b>9.22</b> | <b>0.71</b> | <b>5</b> | <b>12.99</b> | <b>&lt; .001***</b> |
| CI_Exp < 1 | Syllable 1 | −0.58       | 0.70        | 75       | −0.83        | .407                |
|            | Syllable 2 | −0.34       | 1.43        | 75       | −0.24        | .814                |
| CI_Exp 1-2 | Syllable 1 | 0.18        | 0.43        | 19       | 0.42         | .678                |
|            | Syllable 2 | −0.45       | 1.02        | 19       | −0.44        | .663                |
| CI_Exp 2-3 | Syllable 1 | −0.06       | 0.47        | 23       | −0.14        | .890                |
|            | Syllable 2 | −0.91       | 1.06        | 23       | −0.85        | .403                |
| CI_Exp 3-4 | Syllable 1 | 0.54        | 0.77        | 104      | 0.70         | .483                |
|            | Syllable 2 | 1.52        | 1.55        | 104      | 0.98         | .328                |

*Note.* NH = normal hearing; CI = cochlear implant.
