# Supplementary material
Source: publisher figshare collection journal article supplement (https://asha.figshare.com/articles/dataset/_/8038889)
Supplement: Supplementary file 34 [file 1]

**Supplemental Material S15.** Pairwise comparisons of neutral tone pitch slope between groups (NH = 3, CI\_Imp 1-2, CI\_Imp 2-3, CI\_Imp 3-4, and CI\_Imp 4-5) across types (Reduplicative and Possessive) and contexts (after T1/2/4 and after T3).

| Type                         | Context               | Group difference             | $\beta$      | SE          | df          | $t$              | $p$                 |
|------------------------------|-----------------------|------------------------------|--------------|-------------|-------------|------------------|---------------------|
| Reduplicative                | After T1/2/4          | NH = 3 – CI_Imp1-2           | -1.75        | 1.06        | 521         | -1.50            | .069                |
|                              |                       | <b>NH = 3 – CI_Imp2-3</b>    | <b>-2.81</b> | <b>1.22</b> | <b>485</b>  | <b>-2.66</b>     | <b>&lt; .05*</b>    |
|                              |                       | <b>NH = 3 – CI_Imp3-4</b>    | <b>-2.78</b> | <b>1.85</b> | <b>405</b>  | <b>-2.50</b>     | <b>&lt; .05*</b>    |
|                              |                       | <b>NH = 3 – CI_Imp4-5</b>    | <b>-2.30</b> | <b>0.97</b> | <b>536</b>  | <b>-2.31</b>     | <b>&lt; .05*</b>    |
|                              |                       | CI_Imp1-2 – CI_Imp2-3        | -0.06        | 0.92        | 415         | -0.06            | 1.000               |
|                              |                       | CI_Imp1-2 – CI_Imp3-4        | -1.03        | 1.67        | 373         | -1.21            | .743                |
|                              |                       | CI_Imp1-2 – CI_Imp4-5        | -0.44        | 0.54        | 418         | -0.82            | .926                |
|                              |                       | CI_Imp2-3 – CI_Imp3-4        | -1.97        | 1.78        | 376         | -1.11            | .801                |
|                              |                       | CI_Imp2-3 – CI_Imp4-5        | -0.50        | 0.81        | 405         | -0.62            | .972                |
|                              | CI_Imp3-4 – CI_Imp4-5 | -2.48                        | 1.62         | 368         | -1.53       | .543             |                     |
|                              | After T3              | NH = 3 – CI_Imp1-2           | 1.81         | 1.82        | 2333        | 1.55             | .532                |
|                              |                       | <b>NH = 3 – CI_Imp2-3</b>    | <b>3.55</b>  | <b>2.00</b> | <b>2132</b> | <b>2.27</b>      | <b>&lt; .05*</b>    |
|                              |                       | <b>NH = 3 – CI_Imp3-4</b>    | <b>3.09</b>  | <b>2.88</b> | <b>1795</b> | <b>2.38</b>      | <b>&lt; .05*</b>    |
|                              |                       | <b>NH = 3 – CI_Imp4-5</b>    | <b>3.28</b>  | <b>1.71</b> | <b>2460</b> | <b>2.16</b>      | <b>&lt; .05*</b>    |
|                              |                       | <b>CI_Imp1-2 – CI_Imp2-3</b> | <b>3.27</b>  | <b>1.29</b> | <b>1513</b> | <b>3.21</b>      | <b>&lt; .01**</b>   |
|                              |                       | <b>CI_Imp1-2 – CI_Imp3-4</b> | <b>3.91</b>  | <b>2.44</b> | <b>1534</b> | <b>3.60</b>      | <b>&lt; .01**</b>   |
|                              |                       | <b>CI_Imp1-2 – CI_Imp4-5</b> | <b>3.09</b>  | <b>0.77</b> | <b>1551</b> | <b>3.00</b>      | <b>&lt; .01**</b>   |
|                              |                       | CI_Imp2-3 – CI_Imp3-4        | 1.64         | 2.58        | 1524        | 1.41             | .620                |
| <b>CI_Imp2-3 – CI_Imp4-5</b> |                       | <b>2.83</b>                  | <b>1.14</b>  | <b>1492</b> | <b>2.48</b> | <b>&lt; .05*</b> |                     |
| CI_Imp3-4 – CI_Imp4-5        | 0.81                  | 2.36                         | 1530         | 0.35        | .997        |                  |                     |
| Possessive                   | After T1/2/4          | NH = 3 – CI_Imp1-2           | -1.09        | 1.43        | 747         | -1.26            | .104                |
|                              |                       | <b>NH = 3 – CI_Imp2-3</b>    | <b>-2.41</b> | <b>1.53</b> | <b>656</b>  | <b>-2.26</b>     | <b>&lt; .05*</b>    |
|                              |                       | <b>NH = 3 – CI_Imp3-4</b>    | <b>-2.88</b> | <b>2.08</b> | <b>486</b>  | <b>-2.42</b>     | <b>&lt; .05*</b>    |
|                              |                       | <b>NH = 3 – CI_Imp4-5</b>    | <b>-2.35</b> | <b>1.34</b> | <b>789</b>  | <b>-2.26</b>     | <b>&lt; .05*</b>    |
|                              |                       | CI_Imp1-2 – CI_Imp2-3        | -0.31        | 0.94        | 410         | -0.34            | .997                |
|                              |                       | CI_Imp1-2 – CI_Imp3-4        | -0.79        | 1.69        | 372         | -0.47            | .990                |
|                              |                       | CI_Imp1-2 – CI_Imp4-5        | -0.26        | 0.58        | 452         | -0.46            | .991                |
|                              |                       | CI_Imp2-3 – CI_Imp3-4        | -0.48        | 1.78        | 368         | 0.27             | .999                |
|                              |                       | CI_Imp2-3 – CI_Imp4-5        | -0.05        | 0.81        | 386         | -0.06            | 1.000               |
|                              | CI_Imp3-4 – CI_Imp4-5 | -0.53                        | 1.62         | 364         | -0.32       | .998             |                     |
|                              | After T3              | <b>NH = 3 – CI_Imp1-2</b>    | <b>2.14</b>  | <b>2.11</b> | <b>3055</b> | <b>2.07</b>      | <b>&lt; .05*</b>    |
|                              |                       | <b>NH = 3 – CI_Imp2-3</b>    | <b>2.47</b>  | <b>2.26</b> | <b>2703</b> | <b>2.10</b>      | <b>&lt; .05*</b>    |
|                              |                       | <b>NH = 3 – CI_Imp3-4</b>    | <b>2.42</b>  | <b>3.04</b> | <b>2039</b> | <b>2.80</b>      | <b>&lt; .05*</b>    |
|                              |                       | <b>NH = 3 – CI_Imp4-5</b>    | <b>4.32</b>  | <b>1.98</b> | <b>3182</b> | <b>4.18</b>      | <b>&lt; .001***</b> |
|                              |                       | CI_Imp1-2 – CI_Imp2-3        | 2.61         | 1.37        | 1770        | 1.90             | .318                |
| CI_Imp1-2 – CI_Imp3-4        |                       | 2.56                         | 2.46         | 1577        | 1.04        | .836             |                     |

---

|                              |             |             |             |             |                     |
|------------------------------|-------------|-------------|-------------|-------------|---------------------|
| <b>CI_Imp1-2 – CI_Imp4-5</b> | <b>4.18</b> | <b>0.85</b> | <b>1982</b> | <b>4.89</b> | <b>&lt; .001***</b> |
| CI_Imp2-3 – CI_Imp3-4        | 0.05        | 2.59        | 1551        | 0.02        | 1.000               |
| <b>CI_Imp2-3 – CI_Imp4-5</b> | <b>6.79</b> | <b>1.18</b> | <b>1630</b> | <b>5.76</b> | <b>&lt; .001***</b> |
| <b>CI_Imp3-4 – CI_Imp4-5</b> | <b>6.74</b> | <b>2.36</b> | <b>1531</b> | <b>2.86</b> | <b>&lt; .05*</b>    |

---

*Note.* NH = normal hearing; CI = cochlear implant.
