# Supplementary material
Source: publisher figshare collection journal article supplement (https://asha.figshare.com/articles/dataset/_/8038889)
Supplement: Supplementary file 35 [file 1]

**Supplemental Material S22.** Pairwise comparisons of normalized duration of neutral tone syllables groups (NH = 3, CI\_Exp < 1, CI\_Exp 1-2, CI\_Exp 2-3, and CI\_Exp 3-4).

| Group difference        | $\beta$ | <i>SE</i> | <i>df</i> | <i>t</i> | <i>p</i>  |
|-------------------------|---------|-----------|-----------|----------|-----------|
| NH = 3 – CI_Exp < 1     | –0.35   | 0.16      | 169       | –2.28    | < .05*    |
| NH = 3 – CI_Exp 1-2     | –0.41   | 0.16      | 165       | –2.16    | < .05*    |
| NH = 3 – CI_Exp 2-3     | –0.43   | 0.40      | 176       | –2.60    | < .05*    |
| NH = 3 – CI_Exp 3-4     | –0.80   | 0.13      | 162       | –5.98    | < .001*** |
| CI_Exp < 1 – CI_Exp 1-2 | 0.07    | 0.14      | 175       | 0.54     | .984      |
| CI_Exp < 1 – CI_Exp 2-3 | 0.11    | 0.39      | 178       | 0.28     | .999      |
| CI_Exp < 1 – CI_Exp 3-4 | 0.25    | 0.10      | 181       | 1.63     | .052      |
| CI_Exp 1-2 – CI_Exp 2-3 | 0.04    | 0.39      | 177       | 0.09     | 1.000     |
| CI_Exp 1-2 – CI_Exp 3-4 | 0.27    | 0.11      | 167       | 1.40     | .082      |
| CI_Exp 2-3 – CI_Exp 3-4 | 0.24    | 0.38      | 178       | 1.18     | .120      |

*Note.* NH = normal hearing; CI = cochlear implant.
