# Supplementary material
Source: publisher figshare collection journal article supplement (https://asha.figshare.com/articles/dataset/_/8038889)
Supplement: Supplementary file 36 [file 1]

**Supplemental Material S28.** Results of linear mixed-effects model on pitch shape (slope and curvature) in children’s disyllabic tone sandhi productions (Syllable 1), with two fixed factors “Group” (NH = 3, CI\_Exp < 1, CI\_Exp 1-2, CI\_Exp 2-3, and CI\_Exp 3-4) and “Context” (full sandhi vs. half sandhi) and a covariate “Chronological Age.”

| Parameter       | Factors                             | df 1     | df 2         | F            | p                   |
|-----------------|-------------------------------------|----------|--------------|--------------|---------------------|
| Pitch slope     | Group                               | 4        | 102          | 1.69         | .157                |
|                 | <b>Context</b>                      | <b>1</b> | <b>4647</b>  | <b>13.12</b> | <b>&lt; .001***</b> |
|                 | Chronological Age                   | 1        | 101          | 0.18         | .676                |
|                 | <b>Group × Context</b>              | <b>4</b> | <b>14716</b> | <b>5.21</b>  | <b>&lt; .001***</b> |
|                 | Group × Chronological Age           | 4        | 101          | 1.62         | .174                |
|                 | Context × Chronological Age         | 1        | 14712        | 2.04         | .153                |
|                 | Group × Context × Chronological Age | 4        | 14713        | 2.10         | .077                |
| Pitch curvature | Group                               | 4        | 141          | 0.92         | .453                |
|                 | Context                             | 1        | 12742        | 2.12         | .145                |
|                 | Chronological Age                   | 1        | 137          | 0.10         | .752                |
|                 | Group × Context                     | 4        | 14733        | 0.91         | .458                |
|                 | Group × Chronological Age           | 4        | 139          | 1.16         | .333                |
|                 | Context × Chronological Age         | 1        | 14725        | 1.19         | .274                |
|                 | Group × Context × Chronological Age | 4        | 14728        | 0.83         | .506                |

*Note.* NH = normal hearing; CI = cochlear implant.
