# Supplementary material
Source: publisher figshare collection journal article supplement (https://asha.figshare.com/articles/dataset/_/8038889)
Supplement: Supplementary file 37 [file 1]

**Supplemental Material S27.** Pairwise comparisons of pitch slope of disyllabic tone sandhi compounds (Syllable 1) between groups (NH = 3, CI\_Imp 1-2, CI\_Imp 2-3, CI\_Imp 3-4, and CI\_Imp 4-5) for each sandhi context (full sandhi and half sandhi).

| Context     | Group difference      | $\beta$ | SE   | df  | $t$   | $p$       |
|-------------|-----------------------|---------|------|-----|-------|-----------|
| Full sandhi | NH = 3 – CI_Imp1-2    | 2.93    | 1.17 | 203 | 2.79  | < .05*    |
|             | NH = 3 – CI_Imp2-3    | 4.55    | 0.73 | 204 | 6.23  | < .001*** |
|             | NH = 3 – CI_Imp3-4    | 4.75    | 0.84 | 200 | 5.68  | < .001*** |
|             | NH = 3 – CI_Imp4-5    | 3.17    | 1.00 | 196 | 3.19  | < .05*    |
|             | CI_Imp1-2 – CI_Imp2-3 | 3.62    | 1.24 | 209 | 2.91  | < .05*    |
|             | CI_Imp1-2 – CI_Imp3-4 | 3.82    | 1.31 | 207 | 2.92  | < .05*    |
|             | CI_Imp1-2 – CI_Imp4-5 | 2.25    | 1.42 | 204 | 1.59  | .508      |
|             | CI_Imp2-3 – CI_Imp3-4 | 0.20    | 0.94 | 211 | 0.21  | 1.000     |
|             | CI_Imp2-3 – CI_Imp4-5 | -1.37   | 1.08 | 204 | -1.27 | .711      |
|             | CI_Imp3-4 – CI_Imp4-5 | -1.57   | 1.16 | 202 | -1.36 | .653      |
| Half sandhi | NH = 3 – CI_Imp1-2    | -7.56   | 0.98 | 102 | -7.69 | < .001*** |
|             | NH = 3 – CI_Imp2-3    | -6.21   | 0.61 | 103 | -6.11 | < .001*** |
|             | NH = 3 – CI_Imp3-4    | -6.39   | 0.71 | 103 | -7.02 | < .001*** |
|             | NH = 3 – CI_Imp4-5    | -8.49   | 0.85 | 102 | -9.04 | < .001*** |
|             | CI_Imp1-2 – CI_Imp2-3 | 1.36    | 1.04 | 103 | 1.30  | .690      |
|             | CI_Imp1-2 – CI_Imp3-4 | 1.18    | 1.10 | 103 | 1.08  | .819      |
|             | CI_Imp1-2 – CI_Imp4-5 | -0.93   | 1.19 | 102 | -0.78 | .936      |
|             | CI_Imp2-3 – CI_Imp3-4 | -0.18   | 0.78 | 104 | -0.22 | .999      |
|             | CI_Imp2-3 – CI_Imp4-5 | -2.28   | 0.91 | 102 | -2.51 | .097      |
|             | CI_Imp3-4 – CI_Imp4-5 | -2.11   | 0.98 | 103 | -2.16 | .203      |

Note. NH = normal hearing; CI = cochlear implant.
