# Supplementary material
Source: publisher figshare collection journal article supplement (https://asha.figshare.com/articles/dataset/_/8038889)
Supplement: Supplementary file 38 [file 1]

**Supplemental Material S19.** Pairwise comparisons of neutral tone pitch slope between contexts (after T1/2/4 vs. after T3) across groups (CI\_Exp < 1, CI\_Exp 1-2, CI\_Exp 2-3, CI\_Exp 3-4, NH = 3).

| <b>Group</b>  | <b><math>\beta</math></b> | <b>SE</b>   | <b>df</b>    | <b><i>t</i></b> | <b><i>p</i></b>    |
|---------------|---------------------------|-------------|--------------|-----------------|--------------------|
| <b>NH = 3</b> | <b>-10.64</b>             | <b>0.82</b> | <b>11955</b> | <b>3.04</b>     | <b>&lt; .01***</b> |
| CI_Exp < 1    | -1.26                     | 0.61        | 11987        | 0.74            | .23                |
| CI_Exp 1-2    | -1.40                     | 0.68        | 11992        | 0.98            | .164               |
| CI_Exp 2-3    | -1.60                     | 2.55        | 12044        | 0.81            | .209               |
| CI_Exp 3-4    | -1.32                     | 0.25        | 11972        | 0.86            | .207               |

*Note.* NH = normal hearing; CI = cochlear implant.
