# Supplementary material
Source: publisher figshare collection journal article supplement (https://asha.figshare.com/articles/dataset/_/8038889)
Supplement: Supplementary file 39 [file 1]

**Supplemental Material S5.** Pairwise comparisons of lexical tone pitch contours (slope and curvature) between groups (NH = 3, CI\_Imp 1-2, CI\_Imp 2-3, CI\_Imp 3-4 and CI\_Imp 4-5) for each tone.

| Tone | Group difference               | Parameter    | $\beta$     | SE          | df         | t           | p                   |
|------|--------------------------------|--------------|-------------|-------------|------------|-------------|---------------------|
| T1   | NH = 3 – CI_Imp 1-2            | Slope        | -0.54       | 1.20        | 593        | -0.45       | .992                |
|      |                                | Curvature    | 0.06        | 1.14        | 777        | 0.05        | 1.000               |
|      | NH = 3 – CI_Imp 2-3            | Slope        | 0.49        | 0.71        | 621        | 0.17        | .979                |
|      |                                | Curvature    | 0.26        | 0.68        | 811        | 0.39        | .995                |
|      | NH = 3 – CI_Imp 3-4            | Slope        | 0.72        | 1.06        | 593        | 0.68        | .961                |
|      |                                | Curvature    | -0.32       | 1.01        | 777        | -0.31       | .998                |
|      | NH = 3 – CI_Imp 4-5            | Slope        | -1.64       | 2.87        | 592        | -0.57       | .979                |
|      |                                | Curvature    | 0.40        | 2.73        | 775        | 0.15        | 1.000               |
|      | CI_Imp 1-2 – CI_Imp 2-3        | Slope        | 2.02        | 1.32        | 599        | 1.54        | .538                |
|      |                                | Curvature    | 0.20        | 1.25        | 784        | 0.16        | 1.000               |
|      | CI_Imp 1-2 – CI_Imp 3-4        | Slope        | 1.26        | 1.53        | 591        | 0.82        | .924                |
|      |                                | Curvature    | -0.37       | 1.45        | 775        | -0.26       | .999                |
|      | CI_Imp 1-2 – CI_Imp 4-5        | Slope        | -1.10       | 3.08        | 591        | -0.36       | .997                |
|      |                                | Curvature    | 0.34        | 2.92        | 775        | 0.12        | 1.000               |
|      | CI_Imp 2-3 – CI_Imp 3-4        | Slope        | -0.76       | 1.19        | 600        | -0.64       | .968                |
|      |                                | Curvature    | -0.58       | 1.13        | 786        | -0.51       | .986                |
|      | CI_Imp 2-3 – CI_Imp 4-5        | Slope        | -3.12       | 2.93        | 593        | -1.07       | .823                |
|      |                                | Curvature    | 0.14        | 2.77        | 777        | 0.05        | 1.000               |
|      | CI_Imp 3-4 – CI_Imp 4-5        | Slope        | -2.36       | 3.03        | 591        | -0.78       | .937                |
|      |                                | Curvature    | 0.71        | 2.87        | 775        | 0.25        | .999                |
| T2   | NH = 3 – CI_Imp 1-2            | Slope        | -0.83       | 1.20        | 592        | -0.70       | .958                |
|      |                                | Curvature    | -0.30       | 1.14        | 776        | -0.27       | .999                |
|      | <b>NH = 3 – CI_Imp 2-3</b>     | <b>Slope</b> | <b>2.69</b> | <b>0.70</b> | <b>594</b> | <b>3.82</b> | <b>&lt; .01**</b>   |
|      |                                | Curvature    | -0.30       | 0.67        | 778        | -0.45       | .992                |
|      | <b>NH = 3 – CI_Imp 3-4</b>     | <b>Slope</b> | <b>5.57</b> | <b>1.06</b> | <b>593</b> | <b>5.25</b> | <b>&lt; .001***</b> |
|      |                                | Curvature    | -1.54       | 1.01        | 776        | -1.53       | .542                |
|      | <b>NH = 3 – CI_Imp 4-5</b>     | <b>Slope</b> | <b>2.02</b> | <b>1.87</b> | <b>591</b> | <b>2.82</b> | <b>&lt; .01**</b>   |
|      |                                | Curvature    | -0.19       | 2.73        | 775        | -0.07       | 1.000               |
|      | <b>CI_Imp 1-2 – CI_Imp 2-3</b> | <b>Slope</b> | <b>3.52</b> | <b>1.31</b> | <b>591</b> | <b>2.69</b> | <b>&lt; .05*</b>    |
|      |                                | Curvature    | 0.00        | 1.24        | 775        | 0.00        | 1.000               |
|      | <b>CI_Imp 1-2 – CI_Imp 3-4</b> | <b>Slope</b> | <b>6.40</b> | <b>1.53</b> | <b>591</b> | <b>4.18</b> | <b>&lt; .001***</b> |
|      |                                | Curvature    | -1.24       | 1.45        | 775        | -0.85       | .914                |
|      | CI_Imp 1-2 – CI_Imp 4-5        | Slope        | 0.86        | 3.08        | 591        | 0.28        | .999                |
|      |                                | Curvature    | 0.11        | 2.92        | 775        | 0.04        | 1.000               |
|      | <b>CI_Imp 2-3 – CI_Imp 3-4</b> | <b>Slope</b> | <b>2.88</b> | <b>1.19</b> | <b>591</b> | <b>2.42</b> | <b>&lt; .05*</b>    |
|      |                                | Curvature    | -1.24       | 1.13        | 775        | -1.11       | .804                |

|                         |                  |              |             |            |              |                     |
|-------------------------|------------------|--------------|-------------|------------|--------------|---------------------|
| CI_Imp 2-3 – CI_Imp 4-5 | Slope            | -2.66        | 2.92        | 591        | -0.91        | .893                |
|                         | Curvature        | 0.11         | 2.77        | 775        | 0.04         | 1.000               |
| CI_Imp 3-4 – CI_Imp 4-5 | Slope            | -5.54        | 3.03        | 591        | -1.83        | .358                |
|                         | Curvature        | 1.35         | 2.87        | 775        | 0.47         | .990                |
| NH = 3 – CI_Imp 1-2     | Slope            | 1.46         | 1.20        | 595        | 1.05         | .147                |
|                         | Curvature        | 1.43         | 1.14        | 780        | 1.18         | .119                |
| NH = 3 – CI_Imp 2-3     | Slope            | 1.11         | 0.71        | 603        | 1.57         | .517                |
|                         | <b>Curvature</b> | <b>4.48</b>  | <b>0.67</b> | <b>789</b> | <b>6.68</b>  | <b>&lt; .001***</b> |
| NH = 3 – CI_Imp 3-4     | Slope            | 0.36         | 1.06        | 596        | 0.34         | .997                |
|                         | <b>Curvature</b> | <b>6.46</b>  | <b>1.01</b> | <b>781</b> | <b>6.41</b>  | <b>&lt; .001***</b> |
| NH = 3 – CI_Imp 4-5     | Slope            | 4.47         | 2.88        | 592        | 1.56         | .527                |
|                         | <b>Curvature</b> | <b>9.73</b>  | <b>2.73</b> | <b>776</b> | <b>3.57</b>  | <b>&lt; .01**</b>   |
| CI_Imp 1-2 – CI_Imp 2-3 | <b>Slope</b>     | <b>3.57</b>  | <b>1.31</b> | <b>591</b> | <b>2.72</b>  | <b>&lt; .05*</b>    |
|                         | Curvature        | 0.05         | 1.24        | 775        | 0.04         | 1.000               |
| CI_Imp 1-2 – CI_Imp 3-4 | <b>Slope</b>     | <b>2.82</b>  | <b>1.53</b> | <b>591</b> | <b>1.84</b>  | <b>&lt; .05*</b>    |
|                         | Curvature        | 2.03         | 1.45        | 775        | 1.40         | .631                |
| CI_Imp 1-2 – CI_Imp 4-5 | Slope            | -2.01        | 3.08        | 591        | -0.65        | .966                |
|                         | Curvature        | 5.30         | 2.92        | 775        | 1.82         | .366                |
| CI_Imp 2-3 – CI_Imp 3-4 | Slope            | -0.75        | 1.19        | 591        | -0.63        | .970                |
|                         | Curvature        | 1.98         | 1.13        | 775        | 1.76         | .401                |
| CI_Imp 2-3 – CI_Imp 4-5 | <b>Slope</b>     | <b>-5.58</b> | <b>2.92</b> | <b>591</b> | <b>-1.91</b> | <b>&lt; .05*</b>    |
|                         | <b>Curvature</b> | <b>5.25</b>  | <b>2.77</b> | <b>775</b> | <b>1.89</b>  | <b>&lt; .05*</b>    |
| CI_Imp 3-4 – CI_Imp 4-5 | Slope            | -4.83        | 3.03        | 591        | -1.60        | .502                |
|                         | Curvature        | 3.27         | 2.87        | 775        | 1.14         | .786                |
| NH = 3 – CI_Imp 1-2     | Slope            | -4.30        | 2.87        | 591        | -1.49        | .567                |
|                         | Curvature        | -0.92        | 1.14        | 776        | -0.81        | .927                |
| NH = 3 – CI_Imp 2-3     | <b>Slope</b>     | <b>-2.15</b> | <b>0.70</b> | <b>593</b> | <b>-3.05</b> | <b>&lt; .01**</b>   |
|                         | <b>Curvature</b> | <b>-1.38</b> | <b>0.67</b> | <b>777</b> | <b>-2.06</b> | <b>&lt; .05*</b>    |
| NH = 3 – CI_Imp 3-4     | <b>Slope</b>     | <b>-2.62</b> | <b>1.06</b> | <b>592</b> | <b>-2.47</b> | <b>&lt; .05*</b>    |
|                         | Curvature        | -1.76        | 1.01        | 776        | -1.75        | .403                |
| NH = 3 – CI_Imp 4-5     | <b>Slope</b>     | <b>-3.62</b> | <b>1.20</b> | <b>592</b> | <b>-3.03</b> | <b>&lt; .01**</b>   |
|                         | Curvature        | 0.83         | 2.73        | 775        | 0.31         | .998                |
| CI_Imp 1-2 – CI_Imp 2-3 | Slope            | 1.47         | 1.31        | 591        | 1.13         | .793                |
|                         | Curvature        | -0.45        | 1.24        | 775        | -0.37        | .996                |
| CI_Imp 1-2 – CI_Imp 3-4 | Slope            | 1.01         | 1.53        | 591        | 0.66         | .966                |
|                         | Curvature        | -0.84        | 1.45        | 775        | -0.58        | .978                |
| CI_Imp 1-2 – CI_Imp 4-5 | Slope            | -0.67        | 3.08        | 591        | -0.22        | 1.000               |
|                         | Curvature        | 1.76         | 2.92        | 775        | 0.60         | .975                |

|                         |           |       |      |     |       |      |
|-------------------------|-----------|-------|------|-----|-------|------|
| CI_Imp 2-3 – CI_Imp 3-4 | Slope     | -0.47 | 1.19 | 591 | -0.40 | .995 |
|                         | Curvature | -0.39 | 1.13 | 775 | -0.34 | .997 |
| CI_Imp 2-3 – CI_Imp 4-5 | Slope     | -2.15 | 2.92 | 591 | -0.73 | .949 |
|                         | Curvature | 2.21  | 2.77 | 775 | 0.80  | .932 |
| CI_Imp 3-4 – CI_Imp 4-5 | Slope     | -1.68 | 3.03 | 591 | -0.55 | .982 |
|                         | Curvature | 2.60  | 2.87 | 775 | 0.90  | .896 |

*Note.* NH = normal hearing; CI = cochlear implant.
